# Supplementary material for: Synthesis, crystal and electronic structures, linear and nonlinear optical properties, and photocurrent response of oxyhalides CeHaVIO4 (Ha = Cl, Br; VI = Mo, W)
Source: Royal Society of Chemistry journal article supplement (doi:10.1039/d3dt03640e), 2023-12-15
Supplement: d3dt03640e1.pdf [file d3dt03640e1.pdf]

Synthesis, Crystal and Electronic Structures, Linear and Nonlinear Optical Properties of Oxyhalides  $\text{CeHaVIO}_4$  ( $\text{Ha}=\text{Cl}, \text{Br}$ ;  $\text{VI}=\text{Mo}, \text{W}$ )

Zixian Jiao <sup>a</sup>, Jasmine Quah <sup>a</sup>, Tajamul Hussain Syed <sup>b</sup>, Wei Wei <sup>b</sup>, Bingbing Zhang <sup>c</sup>, Fei Wang <sup>d,\*</sup>, Jian Wang <sup>a,\*</sup>

<sup>a</sup> Department of Chemistry and Biochemistry, Wichita State University, Wichita, Kansas 67260, United States

<sup>b</sup> College of Chemistry and Environmental Science, Hebei University, Key Laboratory of Analytical Science and Technology of Hebei Province, Baoding 071002, China

<sup>c</sup> Department of Chemistry, Missouri State University, Springfield, Missouri, 65897, United States

Corresponding authors: Fei Wang [FeiWang@MissouriState.edu](mailto:FeiWang@MissouriState.edu), Jian Wang [jian.wang@wichita.edu](mailto:jian.wang@wichita.edu)

- 1. Table S1.** Atomic coordinate parameters for  $\text{CeClMoO}_4$ ,  $\text{CeClWO}_4$ ,  $\text{CeBrMoO}_4$ , and  $\text{CeBrWO}_4$ .
- 2. Table S2.** Selected interatomic distances for  $\text{CeClWO}_4$ ,  $\text{CeClWO}_4$ ,  $\text{CeBrMoO}_4$ , and  $\text{CeBrWO}_4$ .
- 3. Table S3.** A summary of crystal structure and physical properties of reported compounds within the  $\text{REHaVIO}_4$  ( $\text{Ha}=\text{Cl}, \text{Br}$ ;  $\text{RE}=\text{La-Lu}$ ;  $\text{VI}=\text{Mo}, \text{W}$ ) system.
- 4. Table S4.** Comparison of photocurrent density between  $\text{CeHaVIO}_4$  ( $\text{Ha}=\text{Cl}, \text{Br}$ ,  $\text{VI}=\text{Mo}, \text{W}$ ) compounds and selected reported compounds.
- 5. Figure S1.** The optical microscope images of crystals of  $\text{CeHaVIO}_4$  ( $\text{Ha}=\text{Cl}, \text{Br}$ ;  $\text{VI}=\text{Mo}, \text{W}$ ), from left to right:  $\text{CeClMoO}_4$ ,  $\text{CeClWO}_4$ ,  $\text{CeBrMoO}_4$ ,  $\text{CeBrWO}_4$ .
- 6. Figure S2.** Experimental powder X-ray diffraction results of  $\text{CeClMoO}_4$  with theoretical patterns shown at the bottom.
- 7. Figure S3.** Experimental powder X-ray diffraction results of  $\text{CeBrMoO}_4$  with theoretical patterns shown at the bottom.
- 8. Figure S4.** Experimental powder X-ray diffraction results of  $\text{CeClWO}_4$  with theoretical patterns shown at the bottom.
- 9. Figure S5.** Experimental powder X-ray diffraction results of  $\text{CeBrWO}_4$  with theoretical patterns shown at the bottom.
- 10. Figure S6.** The  $(h1l)$  planes of the reciprocal lattices of  $\text{CeClMoO}_4$  and  $\text{CeClWO}_4$ .
- 11. Figure S7.** Experimental powder X-ray diffraction results of  $(\text{La}_{0.5}\text{Ce}_{0.5})\text{ClMoO}_4$  with theoretical patterns shown at the bottom.
- 12. Figure S8.** Experimental powder X-ray diffraction results of  $(\text{La}_{0.5}\text{Ce}_{0.5})\text{ClWO}_4$  with theoretical patterns shown at the bottom.
- 13. Figure S9.** Experimental powder X-ray diffraction results of  $(\text{La}_{0.5}\text{Ce}_{0.5})\text{BrMoO}_4$  with theoretical patterns shown at the bottom.

14. **Figure S10.** Experimental powder X-ray diffraction results of  $(\text{La}_{0.5}\text{Ce}_{0.5})\text{BrWO}_4$  with theoretical patterns shown at the bottom.
15. **Figure S11.** The comparison of bandgaps between  $\text{CeHaVIO}_4$  ( $\text{Ha}=\text{Cl, Br; VI}=\text{Mo, W}$ ),  $\text{LaHaVIO}_4$  ( $\text{Ha}=\text{Cl, Br; VI}=\text{Mo, W}$ ), and  $(\text{La}_{0.5}\text{Ce}_{0.5})\text{HaVIO}_4$  ( $\text{Ha}=\text{Cl, Br; VI}=\text{Mo, W}$ ).
16. **Figure S12.** IR spectrum of  $\text{CeClMoO}_4$  and  $\text{CeBrMoO}_4$ .
17. **Figure S13.** IR spectrum of  $\text{CeClMoO}_4$  and  $\text{CeBrMoO}_4$ .
18. **Figure S14.** DOS and electronic band structure of  $\text{LaBrWO}_4$  from antiferromagnetic calculation.
19. **Figure S15.** DOS and electronic band structure of  $\text{CeClMoO}_4$  from antiferromagnetic calculation.
20. **Figure S16.** DOS and electronic band structure of  $\text{CeClWO}_4$  from antiferromagnetic calculation.
21. **Figure S17.** DOS and electronic band structure of  $\text{CeBrMoO}_4$  from antiferromagnetic calculation.
22. **Figure S18.** DOS and electronic band structure of  $\text{CeBrWO}_4$  from antiferromagnetic calculation.
23. **Figure S19.** Photocurrent density of three samples of  $\text{CeBrMoO}_4$ .
24. **Figure S20.** Photocurrent density of three samples of  $\text{CeBrWO}_4$ .
25. **Figure S21.** Photocurrent density of three samples of  $\text{CeClMoO}_4$ .
26. **Figure S22.** Photocurrent density of three samples of  $\text{CeClWO}_4$ .
27. **Figure S23.** The allowed direct transitions of  $\text{CeClMoO}_4$  sample.
28. **Figure S24.** The allowed direct transitions of  $\text{CeClWO}_4$  sample.
29. **Figure S25.** The allowed direct transitions of  $\text{CeBrMoO}_4$  sample.
30. **Figure S26.** The allowed direct transitions of two  $\text{CeBrWO}_4$  sample.

**Table S1.** Atomic coordinate parameters for CeClMoO<sub>4</sub>, CeClWO<sub>4</sub>, CeBrMoO<sub>4</sub>, and CeBrWO<sub>4</sub>.

| Atom                 | Wyckoff | <i>x</i>    | <i>y</i>    | <i>z</i>    | Occupancy | <i>U</i> <sub>eq</sub> (Å <sup>2</sup> ) |
|----------------------|---------|-------------|-------------|-------------|-----------|------------------------------------------|
| CeClMoO <sub>4</sub> |         |             |             |             |           |                                          |
| Ce1                  | 2a      | 0.49975(3)  | 0.45044(5)  | 0.76321(2)  | 1         | 0.00708(8)                               |
| Ce2                  | 2a      | 0.91378(3)  | 0.04967(5)  | 1.01256(2)  | 1         | 0.00692(8)                               |
| Mo1                  | 2a      | 0.06463(5)  | 0.50589(5)  | 0.72930(5)  | 1         | 0.00512(8)                               |
| Mo2                  | 2a      | 0.34954(5)  | 0.00201(6)  | 0.97764(5)  | 1         | 0.00599(9)                               |
| Cl1                  | 2a      | 0.68372(17) | 1.0092(6)   | 0.76515(17) | 1         | 0.0135(3)                                |
| Cl2                  | 2a      | 0.73163(19) | 0.4896(6)   | 1.01397(16) | 1         | 0.0125(3)                                |
| O1                   | 2a      | 0.4387(4)   | 0.2634(5)   | 1.0444(5)   | 1         | 0.0123(7)                                |
| O2                   | 2a      | 0.4444(4)   | 0.7286(5)   | 0.9888(6)   | 1         | 0.0118(7)                                |
| O3                   | 2a      | -0.0265(4)  | 0.7610(4)   | 0.7927(5)   | 1         | 0.0081(6)                                |
| O4                   | 2a      | -0.0213(4)  | 0.2304(4)   | 0.7380(5)   | 1         | 0.0069(6)                                |
| O5                   | 2a      | 0.1692(4)   | -0.0269(6)  | 1.0117(4)   | 1         | 0.0095(6)                                |
| O6                   | 2a      | 0.2427(4)   | 0.4984(8)   | 0.7722(4)   | 1         | 0.0100(6)                                |
| O7                   | 2a      | 0.3673(5)   | 0.0702(6)   | 0.7612(4)   | 1         | 0.0135(9)                                |
| O8                   | 2a      | 0.0570(5)   | 0.5609(5)   | 0.5111(3)   | 1         | 0.0074(7)                                |
| CeClWO <sub>4</sub>  |         |             |             |             |           |                                          |
| Ce1                  | 2a      | 0.74728(5)  | 0.94769(18) | 0.16606(15) | 1         | 0.0073(3)                                |
| Ce2                  | 2a      | 0.24731(5)  | 0.94579(18) | 0.42028(16) | 1         | 0.0073(3)                                |
| Ce3                  | 2a      | 0.96537(3)  | 0.9986(2)   | 0.25194(9)  | 1         | 0.00419(16)                              |
| Ce4                  | 2a      | 0.46558(3)  | 1.0029(3)   | 0.55740(10) | 1         | 0.00432(15)                              |
| W1                   | 2a      | 0.82105(4)  | 0.5030(3)   | 0.42716(10) | 1         | 0.00498(19)                              |
| W2                   | 2a      | 0.32184(3)  | 0.5016(2)   | 0.23665(10) | 1         | 0.00578(18)                              |
| W3                   | 2a      | 0.09491(7)  | 1.0031(2)   | 0.4741(2)   | 1         | 0.0032(4)                                |
| W4                   | 2a      | 0.59479(7)  | 0.9986(2)   | 0.1670(2)   | 1         | 0.0029(4)                                |
| Cl1                  | 2a      | 0.6328(2)   | 0.9892(14)  | 0.3584(8)   | 1         | 0.0095(8)                                |
| Cl2                  | 2a      | 0.1323(3)   | 0.9847(17)  | 0.1082(8)   | 1         | 0.0157(13)                               |
| Cl3                  | 2a      | 1.1554(2)   | 0.5118(16)  | 0.3704(7)   | 1         | 0.0116(11)                               |
| Cl4                  | 2a      | 0.6556(2)   | 0.4903(16)  | 0.6216(8)   | 1         | 0.0142(11)                               |
| O1                   | 2a      | 0.0070(6)   | 0.7289(16)  | 0.3237(16)  | 1         | 0.006(2)                                 |
| O2                   | 2a      | 0.5075(5)   | 0.2760(18)  | 0.0801(18)  | 1         | 0.0049(18)                               |
| O3                   | 2a      | 0.0060(6)   | 0.2776(15)  | 0.2709(15)  | 1         | 0.009(2)                                 |
| O4                   | 2a      | 0.7732(5)   | 0.7537(17)  | 0.4605(15)  | 1         | 0.009(2)                                 |
| O5                   | 2a      | 0.5065(4)   | 0.7298(17)  | 0.0163(15)  | 1         | 0.0037(16)                               |
| O6                   | 2a      | 0.7742(6)   | 0.239(2)    | 0.4038(19)  | 1         | 0.013(3)                                 |

|                      |    |             |             |             |   |             |
|----------------------|----|-------------|-------------|-------------|---|-------------|
| O7                   | 2a | 0.2773(5)   | 0.7570(18)  | 0.1468(15)  | 1 | 0.008(2)    |
| O8                   | 2a | 0.4727(4)   | 0.9236(13)  | 0.2873(11)  | 1 | 0.0052(16)  |
| O9                   | 2a | 0.9768(4)   | 0.9351(14)  | 0.0282(10)  | 1 | 0.014(5)    |
| O10                  | 2a | 0.2732(4)   | 0.2338(15)  | 0.2119(14)  | 1 | 0.0039(15)  |
| O11                  | 2a | 0.8130(5)   | 0.5435(18)  | 0.1982(13)  | 1 | 0.010(2)    |
| O12                  | 2a | 0.3204(5)   | 0.5639(14)  | 0.4611(10)  | 1 | 0.0040(16)  |
| O13                  | 2a | 0.4123(4)   | 0.506(2)    | 0.2379(14)  | 1 | 0.0078(18)  |
| O14                  | 2a | 0.9133(5)   | 0.487(3)    | -0.0029(19) | 1 | 0.011(2)    |
| O15                  | 2a | 0.3759(5)   | -0.008(3)   | 0.4931(15)  | 1 | 0.0036(17)  |
| O16                  | 2a | 0.8758(4)   | 0.028(2)    | 0.2370(14)  | 1 | 0.010(2)    |
| CeBrMoO <sub>4</sub> |    |             |             |             |   |             |
| Ce1                  | 2a | -0.49130(2) | 0.45566(4)  | -0.70036(2) | 1 | 0.00712(6)  |
| Ce2                  | 2a | -0.92350(2) | 0.95430(4)  | -0.44924(2) | 1 | 0.00731(6)  |
| Mo1                  | 2a | -0.06780(3) | 0.49756(5)  | -0.73530(4) | 1 | 0.00529(7)  |
| Mo2                  | 2a | -0.34715(3) | 0.00631(5)  | -0.48516(4) | 1 | 0.00581(7)  |
| Br1                  | 2a | -0.67877(5) | 1.0015(2)   | -0.69846(5) | 1 | 0.01132(10) |
| Br2                  | 2a | -0.73596(4) | 0.4998(2)   | -0.94860(5) | 1 | 0.01129(10) |
| O1                   | 2a | -0.4326(3)  | 0.2703(5)   | -0.9718(4)  | 1 | 0.0088(6)   |
| O2                   | 2a | -0.4364(4)  | 0.7367(5)   | -0.9225(4)  | 1 | 0.0091(5)   |
| O3                   | 2a | -0.9798(4)  | 0.7704(5)   | -0.7211(5)  | 1 | 0.0097(6)   |
| O4                   | 2a | -0.9833(4)  | 0.2366(5)   | -0.6710(4)  | 1 | 0.0109(6)   |
| O5                   | 2a | -0.1726(4)  | -0.0018(9)  | -0.4374(4)  | 1 | 0.0136(5)   |
| O6                   | 2a | -0.2431(3)  | 0.5214(6)   | -0.7014(3)  | 1 | 0.0080(5)   |
| O7                   | 2a | -0.3583(5)  | 0.0633(6)   | -0.7009(4)  | 1 | 0.0111(8)   |
| O8                   | 2a | -0.0563(5)  | 0.4396(6)   | -0.9504(4)  | 1 | 0.0113(7)   |
| CeBrWO <sub>4</sub>  |    |             |             |             |   |             |
| Ce1                  | 2a | 0.49162(10) | 0.45288(12) | 0.69896(4)  | 1 | 0.00851(19) |
| Ce2                  | 2a | 0.92431(9)  | 0.95285(12) | 0.44826(4)  | 1 | 0.00792(19) |
| W1                   | 2a | 0.06693(5)  | 0.49777(5)  | 0.72856(6)  | 1 | 0.00643(9)  |
| W2                   | 2a | 0.34760(5)  | 0.00404(5)  | 0.47822(6)  | 1 | 0.00602(9)  |
| Br1                  | 2a | 0.67902(17) | 0.0016(3)   | 0.69697(11) | 1 | 0.0104(3)   |
| Br2                  | 2a | 0.73592(18) | 0.4986(3)   | 0.94727(12) | 1 | 0.0126(3)   |
| O1                   | 2a | 0.4375(7)   | 0.2668(8)   | 0.9696(9)   | 1 | 0.0087(12)  |
| O2                   | 2a | 0.4401(7)   | 0.7376(9)   | 0.9200(9)   | 1 | 0.0097(12)  |
| O3                   | 2a | 0.9860(8)   | 0.7693(8)   | 0.2793(12)  | 1 | 0.0075(11)  |
| O4                   | 2a | 0.9871(8)   | 0.2357(8)   | 0.6669(8)   | 1 | 0.0075(11)  |
| O5                   | 2a | 0.1734(8)   | 0.9996(14)  | 0.4351(8)   | 1 | 0.0065(11)  |
| O6                   | 2a | 0.2442(8)   | 0.5159(16)  | 0.7042(9)   | 1 | 0.0120(15)  |
| O7                   | 2a | 0.3609(11)  | 0.0532(13)  | 0.7011(6)   | 1 | 0.0093(18)  |

|    |    |            |            |           |   |          |
|----|----|------------|------------|-----------|---|----------|
| O8 | 2a | 0.0557(12) | 0.4339(12) | 0.9515(7) | 1 | 0.013(2) |
|----|----|------------|------------|-----------|---|----------|

**Table S2.** Selected interatomic distances for CeClWO<sub>4</sub>, CeClWO<sub>4</sub>, CeBrMoO<sub>4</sub>, and CeBrWO<sub>4</sub>.

**Table S2.** Selected interatomic distances for CeClWO<sub>4</sub>, CeClWO<sub>4</sub>, CeBrMoO<sub>4</sub>, and CeBrWO<sub>4</sub>.

| Atom Pairs           | Distances (Å) |            | Atom Pairs | Distances (Å) |            |
|----------------------|---------------|------------|------------|---------------|------------|
| CeClMoO <sub>4</sub> |               |            |            |               |            |
| Mo1                  | O3            | 1.787(3)   | Ce2        | Cl1           | 2.9579(15) |
|                      | O4            | 1.796(3)   |            | Cl1           | 2.9965(16) |
|                      | O6            | 1.735(4)   |            | Cl2           | 3.086(3)   |
|                      | O8            | 1.765(3)   |            | O3            | 2.485(3)   |
|                      | O8            | 2.274(3)   |            | O3            | 2.547(4)   |
| Mo2                  | O1            | 1.817(3)   |            | O4            | 2.499(4)   |
|                      | O2            | 1.827(3)   |            | O4            | 2.496(3)   |
|                      | O5            | 1.752(4)   |            | O5            | 2.479(4)   |
|                      | O7            | 1.774(3)   |            | O8            | 2.638(4)   |
|                      | O7            | 2.299(3)   |            |               |            |
| Ce1                  | Cl1           | 3.102(3)   |            |               |            |
|                      | Cl2           | 2.9880(16) |            |               |            |
|                      | Cl2           | 2.9923(16) |            |               |            |
|                      | O1            | 2.552(4)   |            |               |            |
|                      | O2            | 2.472(4)   |            |               |            |
|                      | O2            | 2.469(4)   |            |               |            |
|                      | O6            | 2.472(4)   |            |               |            |
|                      | O7            | 2.540(4)   |            |               |            |
|                      |               |            |            |               |            |
| CeClWO <sub>4</sub>  |               |            |            |               |            |
| W1                   | O4            | 1.797(10)  | Ce2        | O7            | 2.576 (12) |
|                      | O6            | 1.798(12)  |            | O7            | 2.479 (11) |
|                      | O11           | 1.778(11)  |            | O10           | 2.472 (10) |
|                      | O11           | 2.169(11)  |            | O10           | 2.469 (10) |
|                      | O14           | 1.784(10)  |            | O12           | 2.654 (8)  |
| W2                   | O7            | 1.810 (10) |            | O15           | 2.488 (9)  |

|          |     |            |     |     |            |
|----------|-----|------------|-----|-----|------------|
|          | O12 | 1.794 (8)  |     | Cl2 | 2.980(5)   |
|          | O12 | 2.179(8)   |     | Cl2 | 2.952 (6)  |
|          | O13 | 1.773(9)   |     | Cl3 | 3.109 (8)  |
| W3       | O1  | 1.823 (10) | Ce3 | O1  | 2.446(13)  |
|          | O3  | 1.820 (9)  |     | O1  | 2.460(16)  |
|          | O9  | 1.842(8)   |     | O3  | 2.497(18)  |
|          | O9  | 2.158 (8)  |     | O3  | 2.499(16)  |
|          | O16 | 1.746 (9)  |     | O9  | 2.530(3)   |
| W4       | O2  | 1.831 (10) |     | O14 | 2.457(10)  |
|          | O5  | 1.826 (10) |     | Cl2 | 3.109 (9)  |
|          | O8  | 2.190 (9)  |     | Cl3 | 2.987 (5)  |
|          | O8  | 1.823 (9)  |     | Cl3 | 2.964 (5)  |
|          | O15 | 1.730 (9)  | Ce4 | O2  | 2.448(12)  |
| Ce1      | O4  | 2.525 (11) |     | O2  | 2.483(14)  |
|          | O4  | 2.500(11)  |     | O5  | 2.525 (11) |
|          | O6  | 2.505 (13) |     | O5  | 2.458(11)  |
|          | O6  | 2.471 (15) |     | O8  | 2.536 (8)  |
|          | O11 | 2.696 (10) |     | O13 | 2.464(8)   |
|          | O16 | 2.514 (9)  |     | Cl1 | 3.133(7)   |
|          | Cl1 | 2.948 (6)  |     | Cl4 | 2.971 (5)  |
|          | Cl1 | 2.965 (5)  |     | Cl4 | 2.985 (6)  |
|          | Cl4 | 3.126 (8)  |     |     |            |
| CeBrMoO4 |     |            |     |     |            |
| Mo1      | O3  | 1.810(3)   | Ce2 | Br1 | 3.1321(5)  |
|          | O4  | 1.805(3)   |     | Br1 | 3.1380(5)  |
|          | O6  | 1.741(3)   |     | Br2 | 3.2172(12) |
|          | O8  | 1.764(3)   |     | O3  | 2.493(3)   |
|          | O8  | 2.320(3)   |     | O3  | 2.496(3)   |
| Mo2      | O1  | 1.818(3)   |     | O4  | 2.493(3)   |
|          | O2  | 1.804(3)   |     | O4  | 2.5634(3)  |
|          | O5  | 1.750(4)   |     | O5  | 2.451(4)   |
|          | O7  | 1.768(3)   |     | O8  | 2.635(4)   |
|          | O7  | 2.321(3)   |     |     |            |

|         |     |            |     |     |            |
|---------|-----|------------|-----|-----|------------|
| Ce1     | Br1 | 3.2167(12) |     |     |            |
|         | Br2 | 3.1245(5)  |     |     |            |
|         | Br2 | 3.1433(5)  |     |     |            |
|         | O1  | 2.499(3)   |     |     |            |
|         | O1  | 2.499(3)   |     |     |            |
|         | O2  | 2.480(3)   |     |     |            |
|         | O6  | 2.457(3)   |     |     |            |
|         | O7  | 2.628(4)   |     |     |            |
| CeBrWO4 |     |            |     |     |            |
| W1      | O3  | 1.797(5)   | Ce2 | Br1 | 3.1393(16) |
|         | O4  | 1.808(5)   |     | Br1 | 3.1501(16) |
|         | O6  | 1.765(8)   |     | Br2 | 3.257(2)   |
|         | O8  | 1.814(5)   |     | O3  | 2.505(7)   |
|         | O8  | 2.239(5)   |     | O3  | 2.511(6)   |
| W2      | O1  | 1.835(5)   |     | O4  | 2.491(6)   |
|         | O2  | 1.842(6)   |     | O4  | 2.573(6)   |
|         | O5  | 1.755(7)   |     | O5  | 2.478(8)   |
|         | O7  | 1.798(5)   |     | O8  | 2.633(9)   |
|         | O7  | 2.230(5)   |     |     |            |
| Ce1     | Br1 | 3.2514(18) |     |     |            |
|         | Br2 | 3.2514(18) |     |     |            |
|         | Br2 | 3.1466(17) |     |     |            |
|         | O1  | 2.474(7)   |     |     |            |
|         | O2  | 2.521(6)   |     |     |            |
|         | O2  | 2.486(6)   |     |     |            |
|         | O2  | 2.537(7)   |     |     |            |
|         | O6  | 2.473(8)   |     |     |            |
|         | O7  | 2.697(9)   |     |     |            |

**Table S3.** A summary of crystal structure and physical properties of reported compounds within the REHaVIO<sub>4</sub> (Ha=Cl, Br; RE= La-Lu; VI=Mo, W) system.

| Compounds | Space Group | Unit cell parameters | Structure Type | Physical Properties | Basic building units | Reference |
|-----------|-------------|----------------------|----------------|---------------------|----------------------|-----------|
|-----------|-------------|----------------------|----------------|---------------------|----------------------|-----------|

|                      |                         |                                                                                                    |                      |                                                                                                                                                                                                                                                                                                                                                                                                                                                                                                                                                                                                                                                                                  |                                                            |                     |
|----------------------|-------------------------|----------------------------------------------------------------------------------------------------|----------------------|----------------------------------------------------------------------------------------------------------------------------------------------------------------------------------------------------------------------------------------------------------------------------------------------------------------------------------------------------------------------------------------------------------------------------------------------------------------------------------------------------------------------------------------------------------------------------------------------------------------------------------------------------------------------------------|------------------------------------------------------------|---------------------|
|                      |                         |                                                                                                    |                      |                                                                                                                                                                                                                                                                                                                                                                                                                                                                                                                                                                                                                                                                                  |                                                            | e                   |
| LaClMoO <sub>4</sub> | <i>P2<sub>1</sub>/c</i> | 19.2055(18)<br>×5.8046(5)<br>×8.0382(7)<br>β=90.040(6) °<br>monoclinic<br>V=896.10Å <sup>3</sup>   | CeClWO <sub>4</sub>  |                                                                                                                                                                                                                                                                                                                                                                                                                                                                                                                                                                                                                                                                                  | [LaO <sub>6</sub> Cl <sub>3</sub> ]<br>[MoO <sub>5</sub> ] | 1                   |
| CeClMoO <sub>4</sub> | <i>P2<sub>1</sub>/c</i> | 19.1228(18)<br>×5.7992(5)<br>×7.9591(7)<br>β=90.037(6) °<br>monoclinic<br>V= 882.64 Å <sup>3</sup> | CeClMoO <sub>4</sub> | Paramagnetic, absence of any significant long range order even at 1.8 K.                                                                                                                                                                                                                                                                                                                                                                                                                                                                                                                                                                                                         | [CeO <sub>6</sub> Cl <sub>3</sub> ]<br>[MoO <sub>5</sub> ] | 1                   |
| NdClMoO <sub>4</sub> | <i>Pbam</i>             | 19.9161(9)<br>×6.9379(3)<br>×7.4253(3)<br>orthorhombic<br>V= 1026.00<br>Å <sup>3</sup>             | NdClMoO <sub>4</sub> |                                                                                                                                                                                                                                                                                                                                                                                                                                                                                                                                                                                                                                                                                  | [NdO <sub>6</sub> Cl <sub>2</sub> ]<br>[MoO <sub>4</sub> ] | 2                   |
| YbClMoO <sub>4</sub> | <i>C12/m</i>            | 10.1019(5)<br>×7.1334(3)<br>×6.7756(3)<br>β= 107.408(2)<br>° monoclinic<br>V=465.89Å <sup>3</sup>  | YbClMoO <sub>4</sub> |                                                                                                                                                                                                                                                                                                                                                                                                                                                                                                                                                                                                                                                                                  | [YbO <sub>6</sub> Cl <sub>2</sub> ]<br>[MoO <sub>4</sub> ] | 3                   |
| LaClWO <sub>4</sub>  | <i>Pbc2<sub>1</sub></i> | 5.893(3)<br>×7.856(4)<br>×19.270(9)<br>orthorhombic<br>V= 892.11 Å <sup>3</sup>                    | LaClWO <sub>4</sub>  | E <sub>g</sub> =4.0(2) eV<br>(La <sub>0.98</sub> Sm <sub>0.02</sub> )ClWO <sub>4</sub> : <sup>4</sup> G <sub>7/2</sub> -<br>> <sup>6</sup> H <sub>9/2</sub> , <sup>4</sup> G <sub>5/2</sub> -> <sup>6</sup> H <sub>7/2</sub> excited by<br>404 nm.<br>(La <sub>0.99</sub> Eu <sub>0.01</sub> )ClWO <sub>4</sub> : <sup>5</sup> D <sub>0</sub> -> <sup>7</sup> F <sub>1</sub> ,<br><sup>5</sup> D <sub>0</sub> -> <sup>7</sup> F <sub>2</sub> , excited by 394 nm.<br>(La <sub>0.995</sub> Tb <sub>0.005</sub> )ClWO <sub>4</sub> : <sup>5</sup> D <sub>4</sub> -> <sup>7</sup> F <sub>6</sub> ,<br><sup>5</sup> D <sub>4</sub> to <sup>7</sup> F <sub>5</sub> excited by 320 nm. | [LaO <sub>6</sub> Cl <sub>3</sub> ]<br>[MoO <sub>5</sub> ] | 4                   |
| LaClWO <sub>4</sub>  | <i>Pmcn</i>             | 5.893(3)<br>×3.928(2)<br>× 19.270(9)<br>orthorhombic<br>V= 446.06 Å <sup>3</sup>                   | LaClWO <sub>4</sub>  |                                                                                                                                                                                                                                                                                                                                                                                                                                                                                                                                                                                                                                                                                  | [LaO <sub>5</sub> Cl <sub>4</sub> ]<br>[MoO <sub>5</sub> ] | 4                   |
| LaBrMoO <sub>4</sub> | <i>P1c1</i>             | 9.8197(4) ×<br>5.8183(2)<br>× 8.1051(3)<br>β=90.039(3) °<br>monoclinic<br>V=463.08Å <sup>3</sup>   | LaBrMoO <sub>4</sub> |                                                                                                                                                                                                                                                                                                                                                                                                                                                                                                                                                                                                                                                                                  | [LaO <sub>6</sub> Br <sub>3</sub> ]<br>[MoO <sub>5</sub> ] | 5                   |
| CeBrMoO <sub>4</sub> | <i>P1c1</i>             | 9.7691(4)<br>×5.8146(2)<br>× 8.0259(3)<br>β=90.004(3) °<br>monoclinic<br>V=455.90Å <sup>3</sup>    | LaBrMoO <sub>4</sub> |                                                                                                                                                                                                                                                                                                                                                                                                                                                                                                                                                                                                                                                                                  | [CeO <sub>6</sub> Br <sub>3</sub> ]<br>[MoO <sub>5</sub> ] | 5                   |
| CeClMoO <sub>4</sub> | <i>P1c1</i>             | 9.55130(10)×<br>5.793×<br>7.94950(10)<br>β=90.0140(7)<br>° monoclinic                              |                      | E <sub>g</sub> =2.9 (1) eV                                                                                                                                                                                                                                                                                                                                                                                                                                                                                                                                                                                                                                                       | [CeO <sub>6</sub> Cl <sub>3</sub> ]<br>[MoO <sub>5</sub> ] | Th<br>is<br>w<br>or |



|                      |      |                                                                                                                                           |                      |                                                                                                                                   |                                                                                    |           |
|----------------------|------|-------------------------------------------------------------------------------------------------------------------------------------------|----------------------|-----------------------------------------------------------------------------------------------------------------------------------|------------------------------------------------------------------------------------|-----------|
|                      |      | V=439.851(7)<br>Å <sup>3</sup>                                                                                                            |                      |                                                                                                                                   |                                                                                    | k         |
| CeClWO <sub>4</sub>  | P1c1 | 19.6059(2)<br>5.89450(10)<br>7.80090(10)<br>β=101.4746(8)<br>° monoclinic<br>V=883.51(2)<br>Å <sup>3</sup>                                |                      | E <sub>g</sub> =3.1 (1) eV                                                                                                        | [CeO <sub>6</sub> Cl <sub>3</sub> ]<br>[MoO <sub>5</sub> ]                         | This work |
| CeBrMoO <sub>4</sub> | P1c1 | 9.77750(10)×<br>5.82090(10)<br>× 8.03220(10)<br>β=90.0106 °<br>monoclinic<br>V=457.143(11)<br>Å <sup>3</sup>                              |                      | E <sub>g</sub> =2.8 (1) eV                                                                                                        | [CeO <sub>6</sub> Br <sub>3</sub> ]<br>[MoO <sub>5</sub> ]                         | This work |
| CeBrWO <sub>4</sub>  | P1c1 | 9.87830(10)×<br>5.92230(10)<br>× 7.93940(10)<br>β=90.0083 °<br>monoclinic<br>V=464.473(11)<br>Å <sup>3</sup>                              |                      | E <sub>g</sub> =3.0 (1) eV                                                                                                        | [CeO <sub>6</sub> Br <sub>3</sub> ]<br>[WO <sub>5</sub> ]                          | This work |
| LuBrWO <sub>4</sub>  | P -1 | 5.9292(3)<br>×7.1869(4)<br>×6.8443(4)<br>α=93.637(3) °<br>β=102.944(3)<br>°<br>γ=121.875(3)<br>°<br>triclinic<br>V= 235.49Å <sup>3</sup>  | LuBrWO <sub>4</sub>  |                                                                                                                                   | [LuO <sub>6</sub> Br]<br>[LuO <sub>4</sub> Br <sub>3</sub> ]<br>[WO <sub>4</sub> ] | 6         |
| TmClWO <sub>4</sub>  | P -1 | 5.9638(3) ×<br>7.2110(4)<br>×6.8551(4)<br>α=93.243(3) °<br>β=103.066(3)<br>°<br>γ=121.995(3)<br>°<br>triclinic<br>V= 237.93Å <sup>3</sup> | LuClMoO <sub>4</sub> |                                                                                                                                   | [TmO <sub>5</sub> Cl <sub>2</sub> ]<br>[WO <sub>4</sub> ]                          | 7         |
| YbClWO <sub>4</sub>  | P -1 | 5.9235(3)<br>×7.1845(4)<br>×6.8448(4)<br>α=93.523(3) °<br>β=103.001(3)<br>°<br>γ=121.745(3)<br>°<br>triclinic<br>V= 235.61Å <sup>3</sup>  | LuClMoO <sub>4</sub> | E <sub>g</sub> =4.23 eV                                                                                                           | [YbO <sub>5</sub> Cl <sub>2</sub> ]<br>[WO <sub>4</sub> ]                          | 7         |
| LuClWO <sub>4</sub>  | P -1 | 5.9292(3) ×<br>7.1869(4) ×<br>6.8443(4)<br>α=93.637(3) °<br>β=102.944(3)                                                                  | LuClMoO <sub>4</sub> | LuClWO <sub>4</sub> :Eu <sup>3+</sup> : <sup>5</sup> D <sub>0</sub> -> <sup>7</sup> F <sub>2</sub> to <sup>7</sup> F <sub>1</sub> | [LuO <sub>5</sub> Cl <sub>2</sub> ]<br>[WO <sub>4</sub> ]                          | 7         |

|                      |                         |                                                                                                                                                                                           |                      |                                                                                                                                                 |                                                            |   |
|----------------------|-------------------------|-------------------------------------------------------------------------------------------------------------------------------------------------------------------------------------------|----------------------|-------------------------------------------------------------------------------------------------------------------------------------------------|------------------------------------------------------------|---|
|                      |                         | $\gamma=121.875(3)$<br>$^\circ$<br>triclinic<br>$V=235.48\text{\AA}^3$                                                                                                                    |                      |                                                                                                                                                 |                                                            |   |
| LuClMoO <sub>4</sub> | <i>P</i> -1             | $5.9142(2)$<br>$\times 7.1619(3)$<br>$\times 6.8144(3)$<br>$\alpha=93.724(2)$<br>$\beta=102.463(2)$<br>$^\circ$<br>$\gamma=122.134(2)$<br>$^\circ$<br>triclinic<br>$V=232.95\text{\AA}^3$ | LuClMoO <sub>4</sub> |                                                                                                                                                 | [LuO <sub>5</sub> Cl <sub>2</sub> ]<br>[MoO <sub>4</sub> ] | 3 |
| SmClMoO <sub>4</sub> | <i>C</i> 12/ <i>m</i> 1 | $10.3480(5)$<br>$\times 7.3602(3)$<br>$\times 6.9084(3)$<br>$\beta=106.677(2)$<br>$^\circ$<br>monoclinic<br>$V=504.04\text{\AA}^3$                                                        | GdClWO <sub>4</sub>  |                                                                                                                                                 | [SmO <sub>6</sub> Cl <sub>2</sub> ]<br>[MoO <sub>4</sub> ] | 3 |
| EuClMoO <sub>4</sub> | <i>C</i> 12/ <i>m</i> 1 | $10.3161(5)$<br>$\times 7.3280(3)$<br>$\times 6.8878(3)$<br>$\beta=106.773(2)$<br>$^\circ$<br>monoclinic<br>$V=498.54\text{\AA}^3$                                                        | GdClWO <sub>4</sub>  | <sup>5</sup> D <sub>0</sub> -> <sup>7</sup> F <sub>0</sub> to <sup>7</sup> F <sub>4</sub> emissions of Eu <sup>3+</sup> in the visible region   | [EuO <sub>6</sub> Cl <sub>2</sub> ]<br>[MoO <sub>4</sub> ] | 3 |
| GdClMoO <sub>4</sub> | <i>C</i> 12/ <i>m</i> 1 | $10.2890(5)$<br>$\times 7.3051(3)$<br>$\times 6.8711(3)$<br>$\beta=106.864(2)$<br>$^\circ$<br>monoclinic<br>$V=494.24\text{\AA}^3$                                                        | GdClWO <sub>4</sub>  | GdCl[MoO <sub>4</sub> ] is a close-to-ideal paramagnet with no hint to magnetic interactions down to 1.8 K.                                     | [GdO <sub>6</sub> Cl <sub>2</sub> ]<br>[MoO <sub>4</sub> ] | 3 |
| TbClMoO <sub>4</sub> | <i>C</i> 12/ <i>m</i> 1 | $10.2517(5)$<br>$\times 7.2682(3)$<br>$\times 6.8497(3)$<br>$\beta=106.963(2)$<br>$^\circ$<br>monoclinic<br>$V=488.18\text{\AA}^3$                                                        | GdClWO <sub>4</sub>  | <sup>5</sup> D <sub>4</sub> -> <sup>7</sup> F <sub>0</sub> to <sup>7</sup> F <sub>6</sub> transitions of Tb <sup>3+</sup> in the visible region | [TbO <sub>6</sub> Cl <sub>2</sub> ]<br>[MoO <sub>4</sub> ] | 3 |
| DyClMoO <sub>4</sub> | <i>C</i> 12/ <i>m</i> 1 | $10.2199(5)$<br>$\times 7.2367(3)$<br>$\times 6.8322(3)$<br>$\beta=107.057(2)$<br>$^\circ$<br>monoclinic<br>$V=483.07\text{\AA}^3$                                                        | GdClWO <sub>4</sub>  | Paramagnet, absence of any long range order down to 1.8 K.                                                                                      | [DyO <sub>6</sub> Cl <sub>2</sub> ]<br>[MoO <sub>4</sub> ] | 3 |
| HoClMoO <sub>4</sub> | <i>C</i> 12/ <i>m</i> 1 | $10.1900(5)$<br>$\times 7.2147(3)$<br>$\times 6.8148(3)$<br>$\beta=107.142(2)$<br>$^\circ$<br>$V=478.75\text{\AA}^3$                                                                      | GdClWO <sub>4</sub>  |                                                                                                                                                 | [HoO <sub>6</sub> Cl <sub>2</sub> ]<br>[MoO <sub>4</sub> ] | 3 |
| ErClMoO <sub>4</sub> | <i>C</i> 12/ <i>m</i> 1 | $10.1536(5)$<br>$\times 7.1874(3)$                                                                                                                                                        | GdClWO <sub>4</sub>  |                                                                                                                                                 | [ErO <sub>6</sub> Cl <sub>2</sub> ]<br>[MoO <sub>4</sub> ] | 3 |

|                      |        |                                                                                                                                                                                                              |                      |                                                                                                                                                                              |                                                                                     |         |
|----------------------|--------|--------------------------------------------------------------------------------------------------------------------------------------------------------------------------------------------------------------|----------------------|------------------------------------------------------------------------------------------------------------------------------------------------------------------------------|-------------------------------------------------------------------------------------|---------|
|                      |        | $\times 6.7964(3)$<br>$\beta=107.236(2)$<br>$\circ$<br>monoclinic<br>$V= 473.71 \text{ \AA}^3$                                                                                                               |                      |                                                                                                                                                                              |                                                                                     |         |
| TmClMoO <sub>4</sub> | C12/m1 | $10.1327(5)$<br>$\times 7.1591(3) \times$<br>$6.7850(3)$<br>$\beta=107.320(2)$<br>$\circ$ monoclinic<br>$V=469.87 \text{ \AA}^3$                                                                             | GdClWO <sub>4</sub>  |                                                                                                                                                                              | [TmO <sub>6</sub> Cl <sub>2</sub> ]<br>[MoO <sub>4</sub> ]                          | 3       |
| GdClWO <sub>4</sub>  | C12/m1 | $10.3219(5) \times 7$<br>$.3249(3) \times$<br>$6.8888(3)$<br>$\beta=107.229(2)$<br>$\circ$<br>monoclinic<br>$V= 497.46 \text{ \AA}^3$                                                                        | GdClWO <sub>4</sub>  | GdClWO <sub>4</sub> :Eu <sup>3+</sup> : <sup>5</sup> D <sub>0</sub> -> <sup>7</sup> F <sub>2</sub> to <sup>7</sup> F <sub>1</sub>                                            |                                                                                     | 2,<br>7 |
| TbClWO <sub>4</sub>  | C12/m1 | $10.2806(5) \times$<br>$7.2858(3) \times$<br>$6.8713(3)$<br>$\beta=107.293(2)$<br>$\circ$<br>monoclinic<br>$V= 491.41 \text{ \AA}^3$                                                                         | GdClWO <sub>4</sub>  | <sup>5</sup> D <sub>4</sub> -> <sup>7</sup> F <sub>5</sub> to <sup>7</sup> F <sub>6</sub> emissions of Tb <sup>3+</sup> in the visible region<br><br>E <sub>g</sub> =4.24 eV |                                                                                     | 7       |
| DyClWO <sub>4</sub>  | C12/m1 | $10.2524(5) \times$<br>$7.2583(3) \times$<br>$6.8561(3)$<br>$\beta= 107.401(2)$<br>$\circ$<br>monoclinic<br>$V= 486.84 \text{ \AA}^3$                                                                        | GdClWO <sub>4</sub>  |                                                                                                                                                                              |                                                                                     | 7       |
| HoClWO <sub>4</sub>  | C12/m1 | $10.2154(5) \times$<br>$7.2303(3) \times$<br>$6.8333(3)$<br>$\beta= 107.470(2)$<br>$\circ$<br>monoclinic<br>$V= 481.43 \text{ \AA}^3$                                                                        | GdClWO <sub>4</sub>  |                                                                                                                                                                              |                                                                                     | 7       |
| ErClWO <sub>4</sub>  | C12/m1 | $10.1877(5) \times$<br>$7.2053(3)$<br>$\times 6.8201(3)$<br>$\beta= 107.561(2)$<br>$\circ$<br>monoclinic<br>$V= 477.30 \text{ \AA}^3$                                                                        | GdClWO <sub>4</sub>  |                                                                                                                                                                              |                                                                                     | 7       |
| PrBrMoO <sub>4</sub> | P -1   | $6.9795(2) \times$<br>$7.4069(2)$<br>$\times 11.2088(4)$<br>$\alpha=$<br>$105.945(2) \circ$<br>$\beta= 106.702(2)$<br>$\circ$<br>$\gamma= 92.355(2) \circ$<br>triclinic<br>$V=$<br>$92.355(2) \text{ \AA}^3$ | YbBrMoO <sub>4</sub> |                                                                                                                                                                              | [PrO <sub>4</sub> Br <sub>3</sub> ]<br>[PrO <sub>6</sub> Br]<br>[MoO <sub>4</sub> ] | 8       |
| NdBrMoO <sub>4</sub> | P -1   | 6.9529(2)                                                                                                                                                                                                    | YbBrMoO <sub>4</sub> |                                                                                                                                                                              | [NdO <sub>4</sub> Br <sub>3</sub> ]                                                 | 8       |

|                    |             |                                                                                                                                                                                                     |                    |  |                                                                              |   |
|--------------------|-------------|-----------------------------------------------------------------------------------------------------------------------------------------------------------------------------------------------------|--------------------|--|------------------------------------------------------------------------------|---|
|                    |             | $\times 7.3756(2)$<br>$\times 11.1770(4)$<br>$\alpha =$<br>$106.061(2)^\circ$<br>$\beta = 106.743(2)^\circ$<br>$\gamma = 92.329(2)^\circ$<br>triclinic<br>$V = 522.92 \text{ \AA}^3$                |                    |  | $[\text{NdO}_6\text{Br}]$<br>$[\text{MoO}_4]$                                |   |
| $\text{SmBrMoO}_4$ | <i>P</i> -1 | $6.9138(2)$<br>$\times 7.3078(2)$<br>$\times 11.1045(4)$<br>$\alpha =$<br>$106.061(2)^\circ$<br>$\beta = 106.983(2)^\circ$<br>$\gamma = 92.239(2)^\circ$<br>triclinic<br>$V = 511.24 \text{ \AA}^3$ | $\text{YbBrMoO}_4$ |  | $[\text{SmO}_4\text{Br}_3]$<br>$[\text{SmO}_6\text{Br}]$<br>$[\text{MoO}_4]$ | 8 |
| $\text{GdBrMoO}_4$ | <i>P</i> -1 | $6.8853(2) \times$<br>$7.2628(2)$<br>$\times 11.0593(4)$<br>$\alpha =$<br>$106.142(2)^\circ$<br>$\beta = 107.098(2)^\circ$<br>$\gamma = 92.260(2)^\circ$<br>triclinic<br>$V = 503.31 \text{ \AA}^3$ | $\text{YbBrMoO}_4$ |  | $[\text{GdO}_4\text{Br}_3]$<br>$[\text{GdO}_6\text{Br}]$<br>$[\text{MoO}_4]$ | 8 |
| $\text{TbBrMoO}_4$ | <i>P</i> -1 | $6.8664(2) \times$<br>$7.2206(2)$<br>$\times 10.9705(4)$<br>$\alpha =$<br>$105.574(2)^\circ$<br>$\beta = 107.262(2)^\circ$<br>$\gamma = 92.516(2)^\circ$<br>triclinic<br>$V = 495.81 \text{ \AA}^3$ | $\text{YbBrMoO}_4$ |  | $[\text{TbO}_4\text{Br}_3]$<br>$[\text{TbO}_6\text{Br}]$<br>$[\text{MoO}_4]$ | 8 |
| $\text{DyBrMoO}_4$ | <i>P</i> -1 | $6.8565(2) \times$<br>$7.1913(2)$<br>$\times 10.9319(4)$<br>$\alpha =$<br>$105.397(2)^\circ$<br>$\beta = 107.332(2)^\circ$<br>$\gamma = 92.750(2)^\circ$<br>triclinic<br>$V = 491.33 \text{ \AA}^3$ | $\text{YbBrMoO}_4$ |  | $[\text{DyO}_4\text{Br}_3]$<br>$[\text{DyO}_6\text{Br}]$<br>$[\text{MoO}_4]$ | 8 |
| $\text{HoBrMoO}_4$ | <i>P</i> -1 | $6.8516(2)$<br>$\times 7.1793(2)$<br>$\times 10.8832(4)$<br>$\alpha =$<br>$105.0310(10)^\circ$<br>$\beta = 107.3420(10)^\circ$<br>$\gamma =$                                                        | $\text{YbBrMoO}_4$ |  | $[\text{HoO}_4\text{Br}_3]$<br>$[\text{HoO}_6\text{Br}]$<br>$[\text{MoO}_4]$ | 8 |

|                      |             |                                                                                                                                                           |                      |  |                                                                                     |   |
|----------------------|-------------|-----------------------------------------------------------------------------------------------------------------------------------------------------------|----------------------|--|-------------------------------------------------------------------------------------|---|
|                      |             | 93.1450(10) °<br>triclinic<br>V= 488.42 Å <sup>3</sup>                                                                                                    |                      |  |                                                                                     |   |
| ErBrMoO <sub>4</sub> | <i>P</i> -1 | 6.8481(2)<br>×7.1600(2)<br>×10.8135(4)<br>α=<br>104.4300(10)<br>°<br>β=107.4550(10)<br>°<br>γ=<br>93.6640(10) °<br>triclinic<br>V= 484.29 Å <sup>3</sup>  | YbBrMoO <sub>4</sub> |  | [ErO <sub>4</sub> Br <sub>3</sub> ]<br>[ErO <sub>6</sub> Br]<br>[MoO <sub>4</sub> ] | 8 |
| TmBrMoO <sub>4</sub> | <i>P</i> -1 | 6.8610(2) ×<br>7.1504(2)<br>×10.7455(4)<br>α=<br>103.613(2) °<br>β=107.627(2)<br>°<br>γ= 94.238(2) °<br>triclinic<br>V= 482.26 Å <sup>3</sup>             | YbBrMoO <sub>4</sub> |  | [TmO <sub>4</sub> Br <sub>3</sub> ]<br>[TmO <sub>6</sub> Br]<br>[MoO <sub>4</sub> ] | 8 |
| YbBrMoO <sub>4</sub> | <i>P</i> -1 | 6.8600(2) ×<br>7.1324(2)<br>×10.6973(4)<br>α=<br>103.2340(10)<br>°<br>β=107.6650(10)<br>°<br>γ=<br>94.7120(10) °<br>triclinic<br>V= 478.95 Å <sup>3</sup> | YbBrMoO <sub>4</sub> |  | [YbO <sub>4</sub> Br <sub>3</sub> ]<br>[YbO <sub>6</sub> Br]<br>[MoO <sub>4</sub> ] | 8 |
| LuBrMoO <sub>4</sub> | <i>P</i> -1 | 6.8594(2)<br>×7.1270(2)<br>×10.6618(4)<br>α=102.954(2)<br>°<br>β=107.688(2)<br>°<br>γ=95.034(2)<br>°<br>triclinic<br>V= 477.08 Å <sup>3</sup>             | YbBrMoO <sub>4</sub> |  | [LuO <sub>4</sub> Br <sub>3</sub> ]<br>[LuO <sub>6</sub> Br]<br>[MoO <sub>4</sub> ] | 8 |
| GdBrWO <sub>4</sub>  | <i>P</i> -1 | 6.9118(4) ×<br>7.2772(4)<br>×11.0647(6)<br>α=105.518(4)<br>°<br>β=107.514(4)<br>°<br>γ=92.650(4)<br>°<br>triclinic<br>V= 506.50 Å <sup>3</sup>            | YbBrMoO <sub>4</sub> |  |                                                                                     | 9 |
| TbBrWO <sub>4</sub>  | <i>P</i> -1 | 6.9050(4) ×                                                                                                                                               | YbBrMoO <sub>4</sub> |  |                                                                                     | 9 |

|                     |             |                                                                                                                                             |                      |                                             |  |   |
|---------------------|-------------|---------------------------------------------------------------------------------------------------------------------------------------------|----------------------|---------------------------------------------|--|---|
|                     |             | 7.2425(4)<br>×10.9718(6)<br>α=104.663(4)<br>°<br>β=107.754(4)<br>° γ=93.058(4)<br>°<br>triclinic<br>V= 500.44 Å <sup>3</sup>                |                      |                                             |  |   |
| DyBrWO <sub>4</sub> | <i>P</i> -1 | 6.8970(4)<br>×7.2193(4)<br>×10.9266(6)<br>α=104.366(4)<br>°<br>β=107.811(4)<br>° γ=93.460(4)<br>°<br>triclinic<br>V= 496.27 Å <sup>3</sup>  | YbBrMoO <sub>4</sub> |                                             |  | 9 |
| ErBrWO <sub>4</sub> | <i>P</i> -1 | 6.8976(4)<br>×7.1902(4)<br>×10.8208(6)<br>α=103.365(4)<br>°<br>β=107.994(4)<br>° γ=94.347(4)<br>°<br>triclinic<br>V= 490.26 Å <sup>3</sup>  | YbBrMoO <sub>4</sub> |                                             |  | 9 |
| HoBrWO <sub>4</sub> | <i>P</i> -1 | 6.8957(4) ×<br>7.2050(4)<br>×10.8732(6)<br>α=103.885(4)<br>°<br>β=107.892(4)<br>° γ=93.915(4)<br>°<br>triclinic<br>V= 493.13 Å <sup>3</sup> | YbBrMoO <sub>4</sub> | without any magnetic ordering<br>above 60 K |  | 9 |
| TmBrWO <sub>4</sub> | <i>P</i> -1 | 6.8927(3)<br>×7.1725(4)<br>×10.7748(6)<br>α=102.922(4)<br>°<br>β=108.122(4)<br>° γ=94.577(4)<br>°<br>triclinic<br>V= 486.98 Å <sup>3</sup>  | YbBrMoO <sub>4</sub> |                                             |  | 9 |
| YbBrWO <sub>4</sub> | <i>P</i> -1 | 6.8857(4)<br>×7.1496(4)<br>×10.7432(6)<br>α=102.715(4)<br>°<br>β=108.201(4)<br>° γ=94.859(4)<br>°<br>triclinic                              | YbBrMoO <sub>4</sub> |                                             |  | 9 |

|  |  |                            |  |  |  |
|--|--|----------------------------|--|--|--|
|  |  | $V = 483.33 \text{ \AA}^3$ |  |  |  |
|--|--|----------------------------|--|--|--|

**Table S4.** Comparison of photocurrent density between  $\text{CeHaVIO}_4$  (Ha=Cl, Br, VI=Mo, W) compounds and selected reported compounds.

| Compounds                                                              | Current Density ( $\mu\text{A}/\text{cm}^2$ ) | Reference |
|------------------------------------------------------------------------|-----------------------------------------------|-----------|
| $\text{Rb}_2\text{Ba}_3\text{Cu}_2\text{Sb}_2\text{S}_{10}$            | 0.006                                         | 10        |
| $\text{Pb}_5\text{Sn}_3\text{S}_{10}\text{Cl}_2$                       | 0.019                                         | 11        |
| $\text{RbIn}_4\text{S}_6\text{Cl}$                                     | 0.029                                         | 11        |
| $\text{BaCuSbSe}_3$                                                    | 0.03                                          | 12        |
| $\text{BaCuSbS}_3$                                                     | 0.055                                         | 12        |
| $\text{Sr}_6\text{Cd}_2\text{Sb}_6\text{S}_{10}\text{O}_7$             | 0.065                                         | 13        |
| $\text{Eu}_3\text{Gd}_6\text{MgS}_2\text{B}_{20}\text{O}_{41}$         | 0.12                                          | 14        |
| $\text{CeBrWO}_4$                                                      | 0.1615                                        | This work |
| $\text{LaNi}_{0.8}\text{Fe}_{0.2}\text{O}_3$                           | 0.25                                          | 15        |
| $\text{CeBrMoO}_4$                                                     | 0.3321                                        | This work |
| $\text{Cs}_2\text{CuBr}_4$                                             | 0.5                                           | 16        |
| $\text{CeClWO}_4$                                                      | 0.5527                                        | This work |
| $\text{CeClMoO}_4$                                                     | 0.747                                         | This work |
| $\text{Eu}_8\text{In}_{17.33}\text{S}_3\text{S}_4$                     | 1                                             | 17        |
| $\text{Tm}_4\text{S}_4\text{Te}_3$                                     | 1.1                                           | 18        |
| $\text{Eu}_{5.4}\text{Sm}_{3.6}\text{MgS}_2\text{B}_{20}\text{O}_{41}$ | 1.62                                          | 14        |
| $\text{Zn}_4\text{B}_6\text{O}_{12}\text{S}$                           | 2.1                                           | 19        |
| $\text{Ho}_4\text{S}_4\text{Te}_3$                                     | 2.2                                           | 18        |
| $\text{Gd}_4\text{S}_4\text{Te}_3$                                     | 2.3                                           | 18        |
| $\text{Sr}_2\text{YbRuO}_6$                                            | 5.5                                           | 20        |
| $\text{Rb}_2\text{CuSb}_7\text{S}_{12}$                                | 10                                            | 21        |
| $\text{Ba}_3\text{HgGa}_2\text{S}_7$                                   | 12.2                                          | 22        |
| $\text{La}_{2.1}\text{Bi}_{2.9}\text{Ti}_2\text{O}_{11}\text{Cl}$      | 15                                            | 23        |
| $\text{Ba}_2\text{ZnSe}_3$                                             | 25                                            | 24        |
| $\text{BaAu}_2\text{S}_2$                                              | 30                                            | 25        |

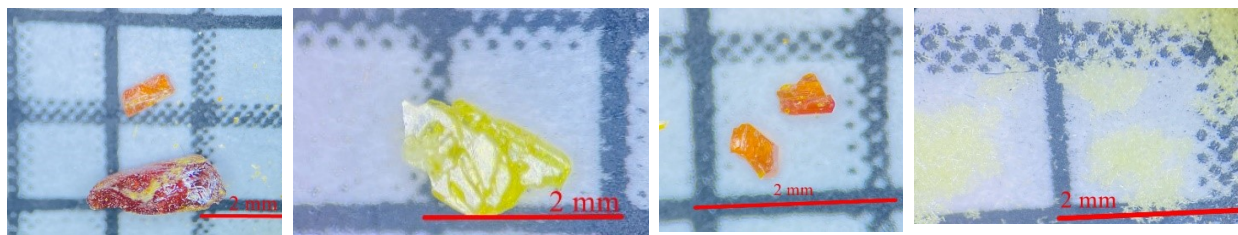

**Figure S1.** The optical microscope images of crystals of  $\text{CeHaVIO}_4$  (Ha=Cl, Br; VI=Mo, W), from left to right:  $\text{CeClMoO}_4$ ,  $\text{CeClWO}_4$ ,  $\text{CeBrMoO}_4$ ,  $\text{CeBrWO}_4$ .

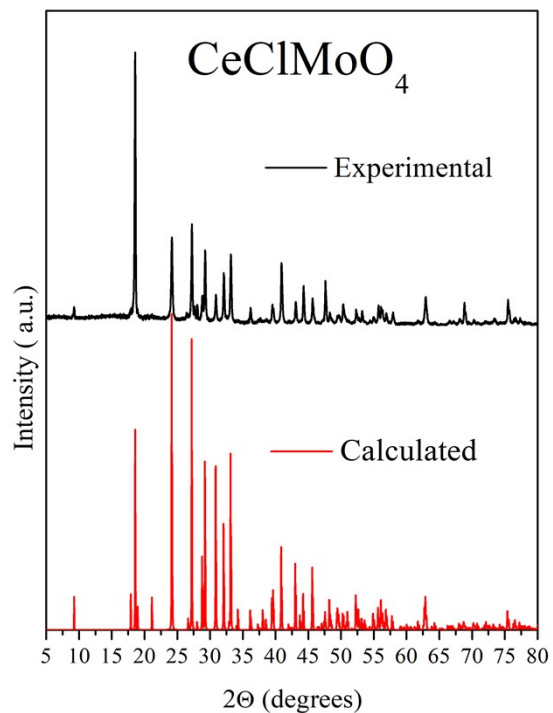

**Figure S2.** Experimental powder X-ray diffraction results of  $\text{CeClMoO}_4$  with theoretical patterns shown at the bottom.

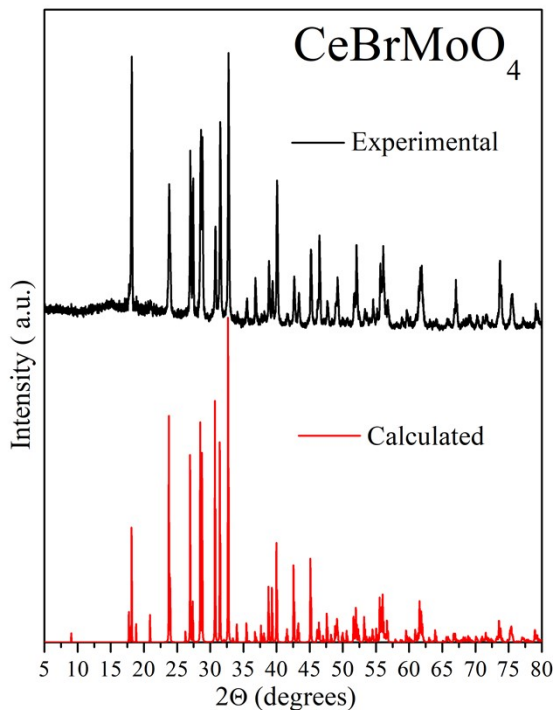



**Figure S3.** Experimental powder X-ray diffraction results of  $\text{CeClWO}_4$  with theoretical patterns shown at the bottom.

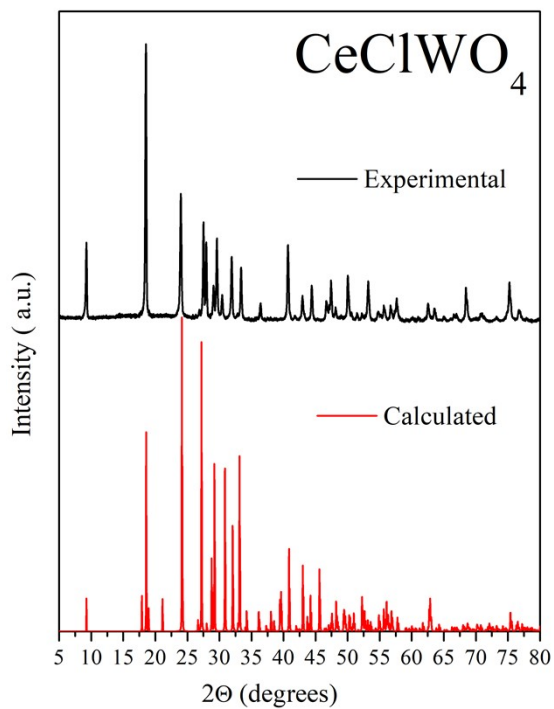

**Figure S4.** Experimental powder X-ray diffraction results of  $\text{CeClWO}_4$  with theoretical patterns shown at the bottom.

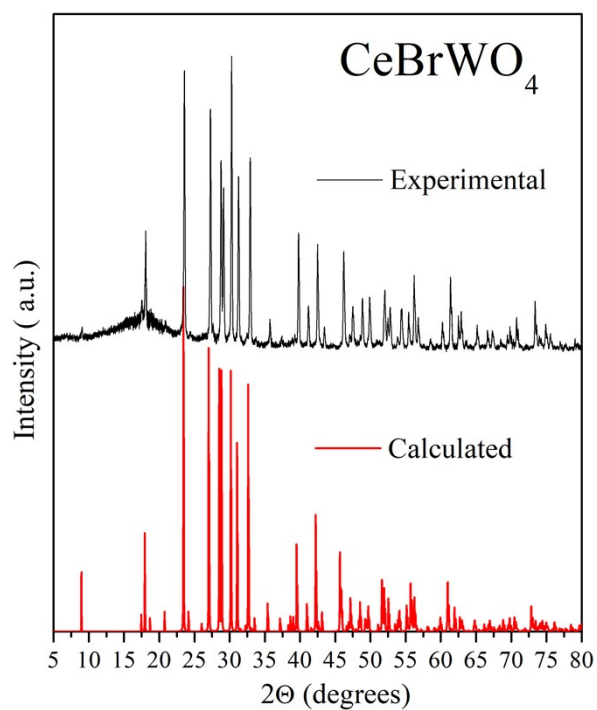

**Figure S5.** Experimental powder X-ray diffraction results of  $\text{CeBrWO}_4$  with theoretical patterns shown at the bottom.

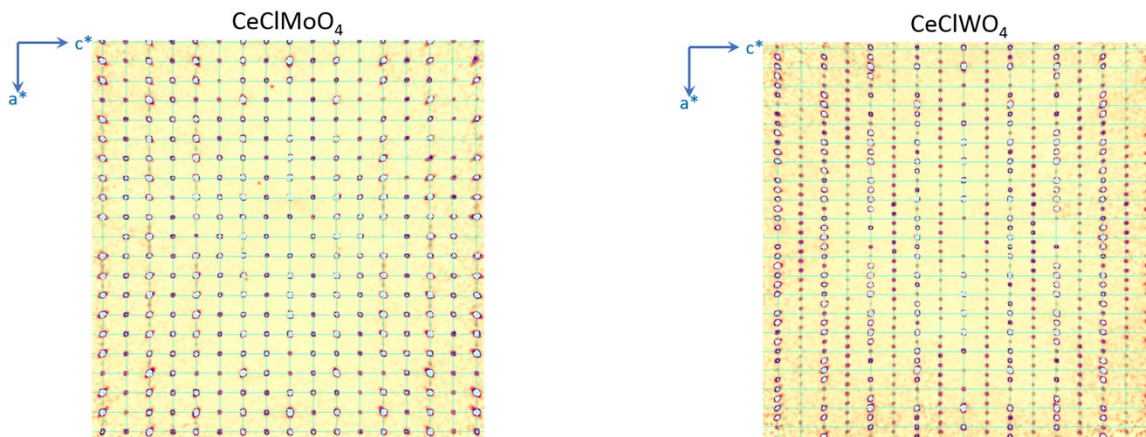

**Figure S6.** The  $(h1l)$  planes of the reciprocal lattices of  $\text{CeClMoO}_4$  and  $\text{CeClWO}_4$ .

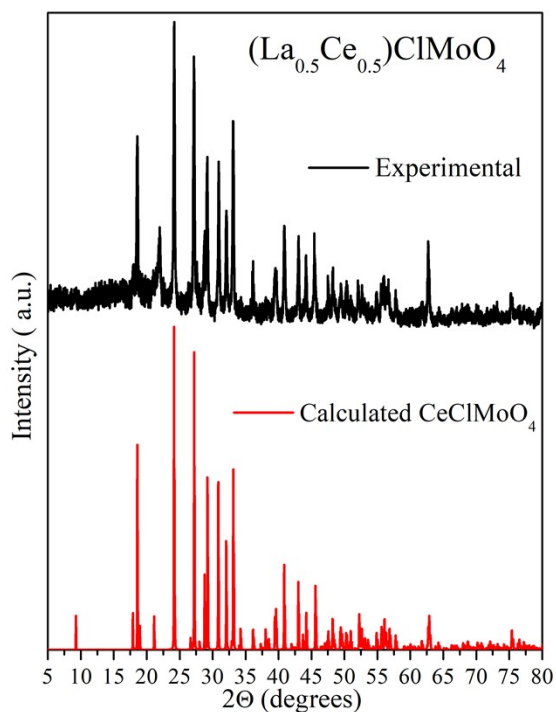

**Figure S7.** Experimental powder X-ray diffraction results of  $(\text{La}_{0.5}\text{Ce}_{0.5})\text{ClMoO}_4$  with theoretical patterns shown at the bottom.

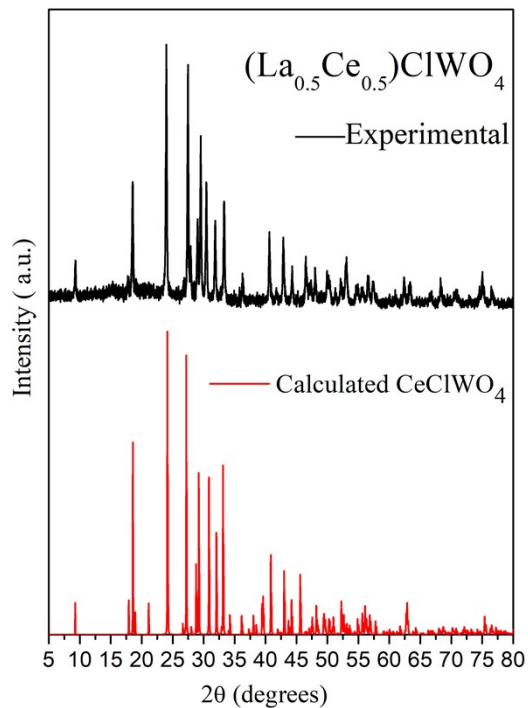

**Figure S8.** Experimental powder X-ray diffraction results of  $(\text{La}_{0.5}\text{Ce}_{0.5})\text{ClWO}_4$  with theoretical patterns shown at the bottom.

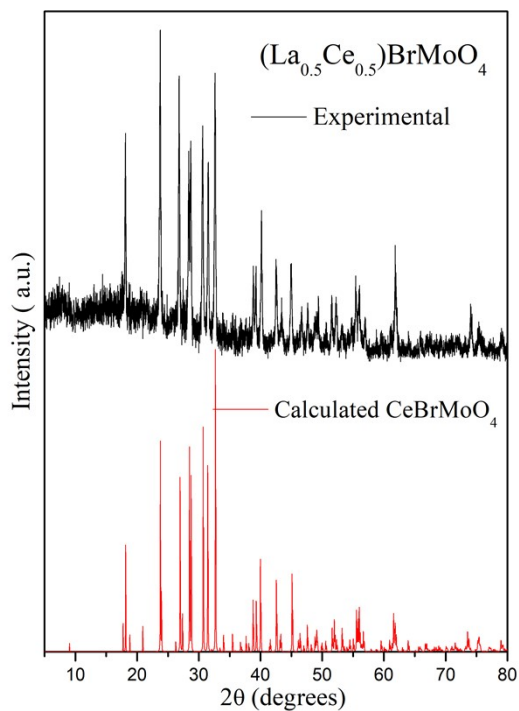

**Figure S9.** Experimental powder X-ray diffraction results of  $(\text{La}_{0.5}\text{Ce}_{0.5})\text{BrMoO}_4$  with theoretical patterns shown at the bottom.

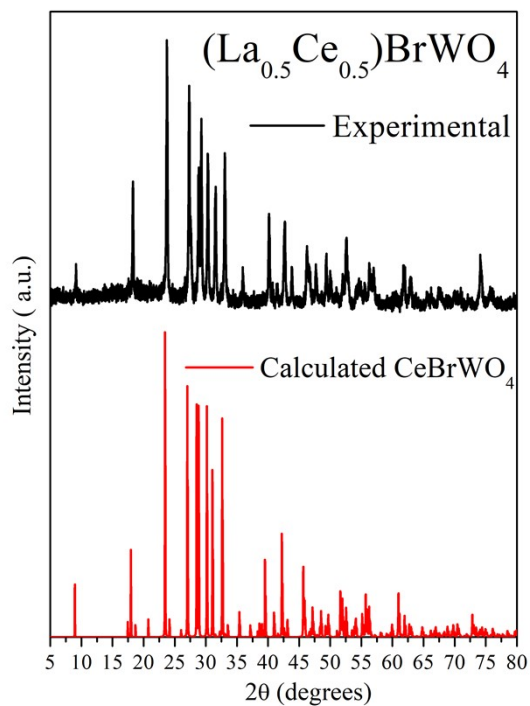

**Figure S10.** Experimental powder X-ray diffraction results of  $(\text{La}_{0.5}\text{Ce}_{0.5})\text{BrWO}_4$  with theoretical patterns shown at the bottom.

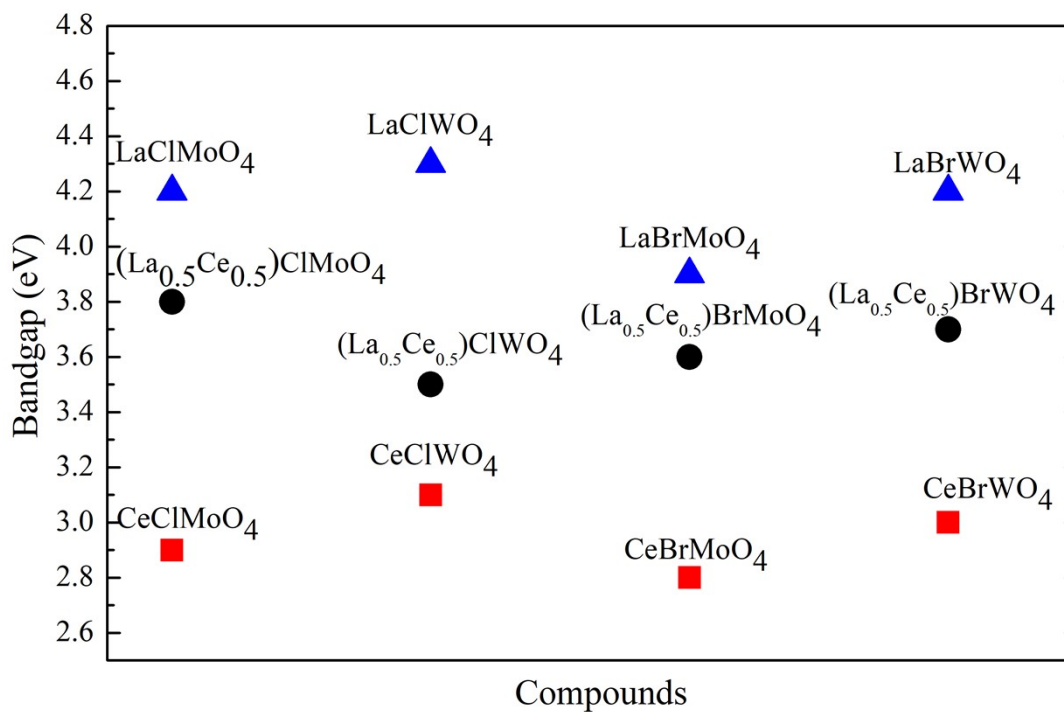

**Figure S11.** The comparison of bandgaps between  $\text{CeHaVIO}_4$  ( $\text{Ha}=\text{Cl}, \text{Br}; \text{VI}=\text{Mo}, \text{W}$ ),  $\text{LaHaVIO}_4$  ( $\text{Ha}=\text{Cl}, \text{Br}; \text{VI}=\text{Mo}, \text{W}$ ), and  $(\text{La}_{0.5}\text{Ce}_{0.5})\text{HaVIO}_4$  ( $\text{Ha}=\text{Cl}, \text{Br}; \text{VI}=\text{Mo}, \text{W}$ ).

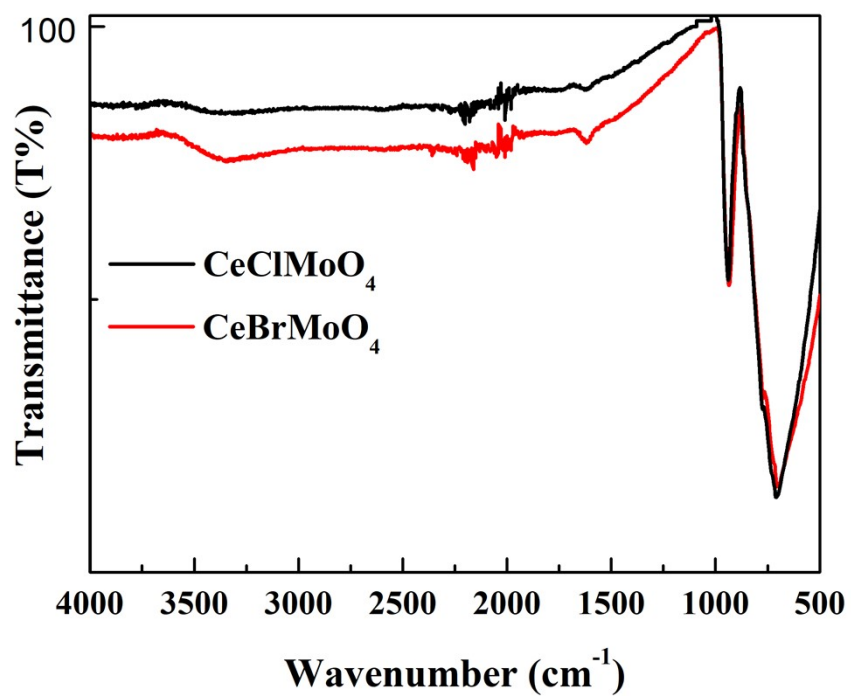

Figure S12. IR spectrum of  $\text{CeClMoO}_4$  and  $\text{CeBrMoO}_4$ .

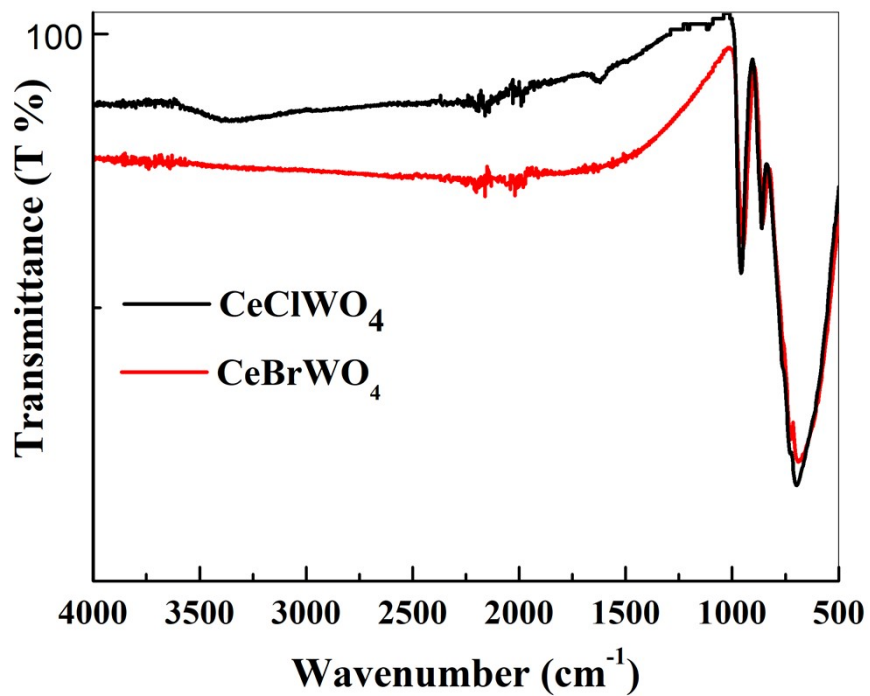

Figure S13. IR spectrum of  $\text{CeClMoO}_4$  and  $\text{CeBrMoO}_4$ .

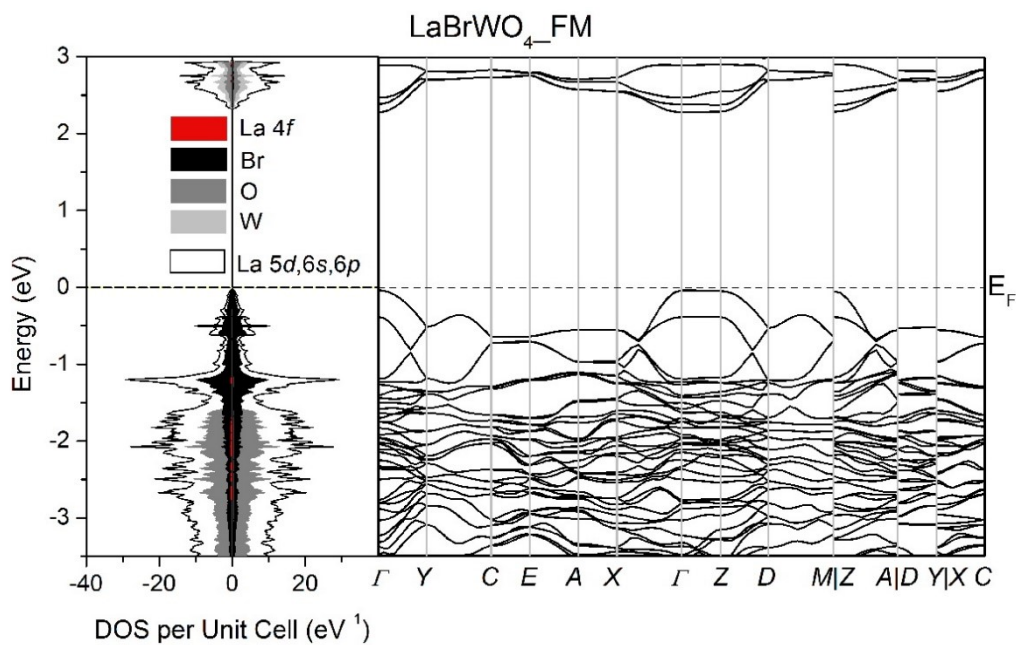

**Figure S14.** DOS and electronic band structure of LaBrWO<sub>4</sub> from antiferromagnetic calculation.

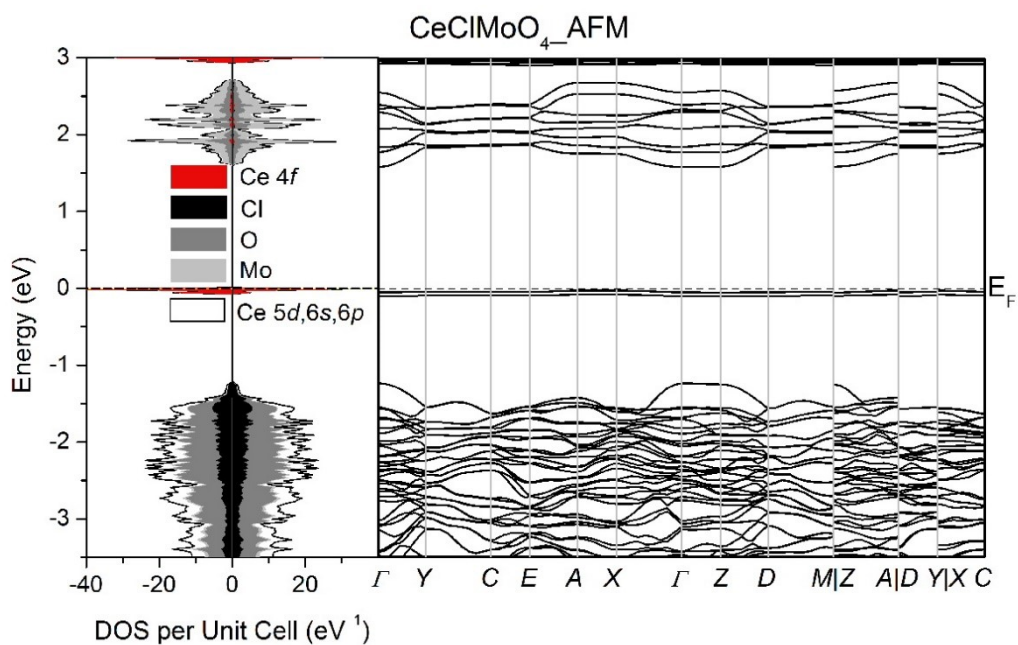

**Figure S15.** DOS and electronic band structure of CeClMoO<sub>4</sub> from antiferromagnetic calculation.



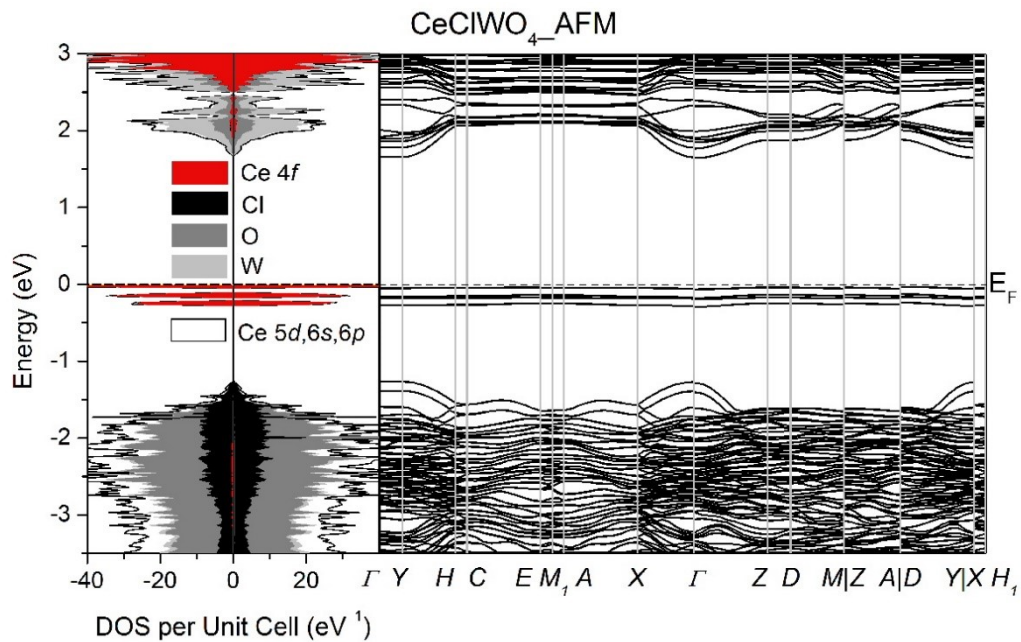

**Figure S16.** DOS and electronic band structure of  $\text{CeClWO}_4$  from antiferromagnetic calculation.

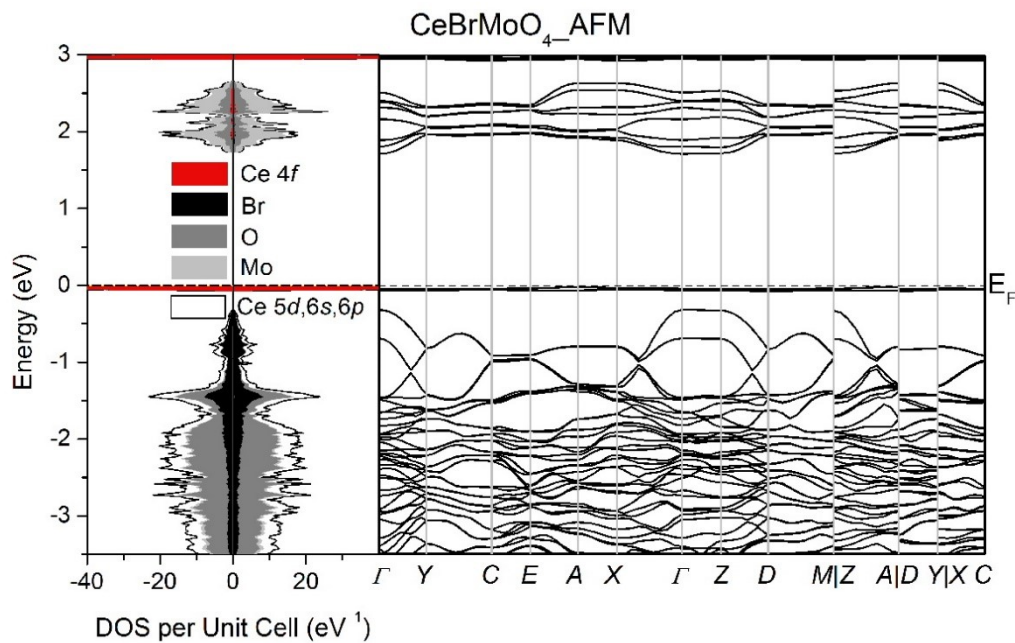

**Figure S17.** DOS and electronic band structure of  $\text{CeBrMoO}_4$  from antiferromagnetic calculation.

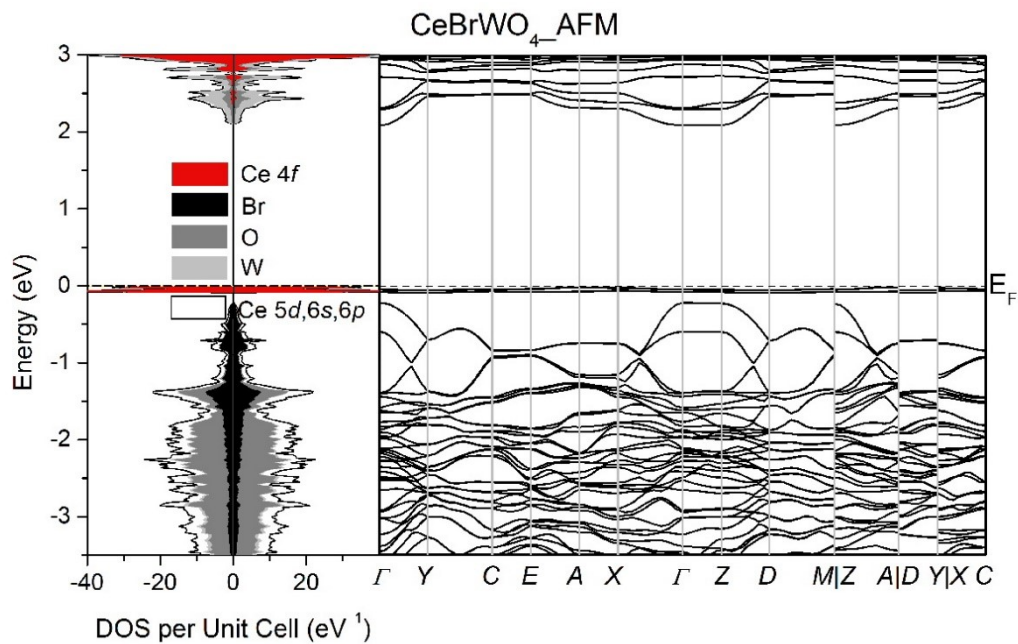

**Figure S18.** DOS and electronic band structure of  $\text{CeBrWO}_4$  from antiferromagnetic calculation.

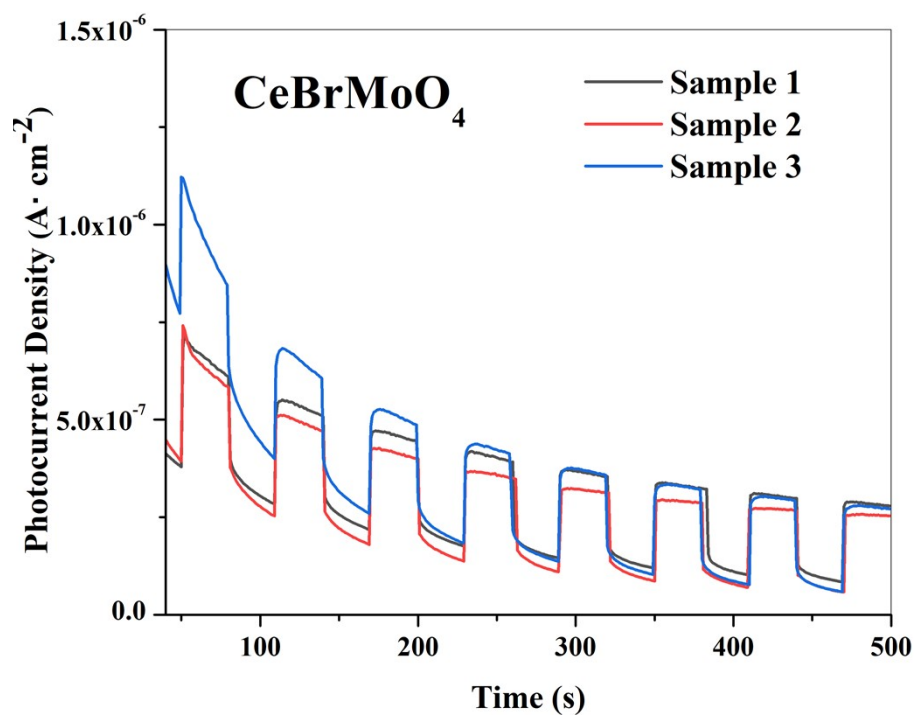

**Figure S19.** Photocurrent density of three samples of  $\text{CeBrMoO}_4$ .



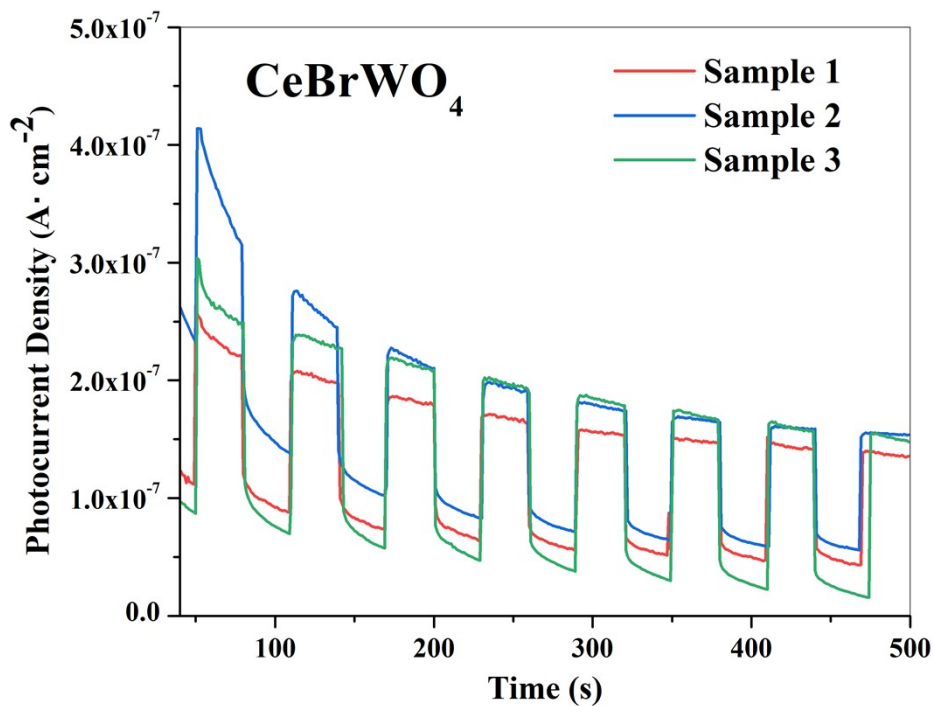

Figure S20. Photocurrent density of three samples of CeBrWO<sub>4</sub>.

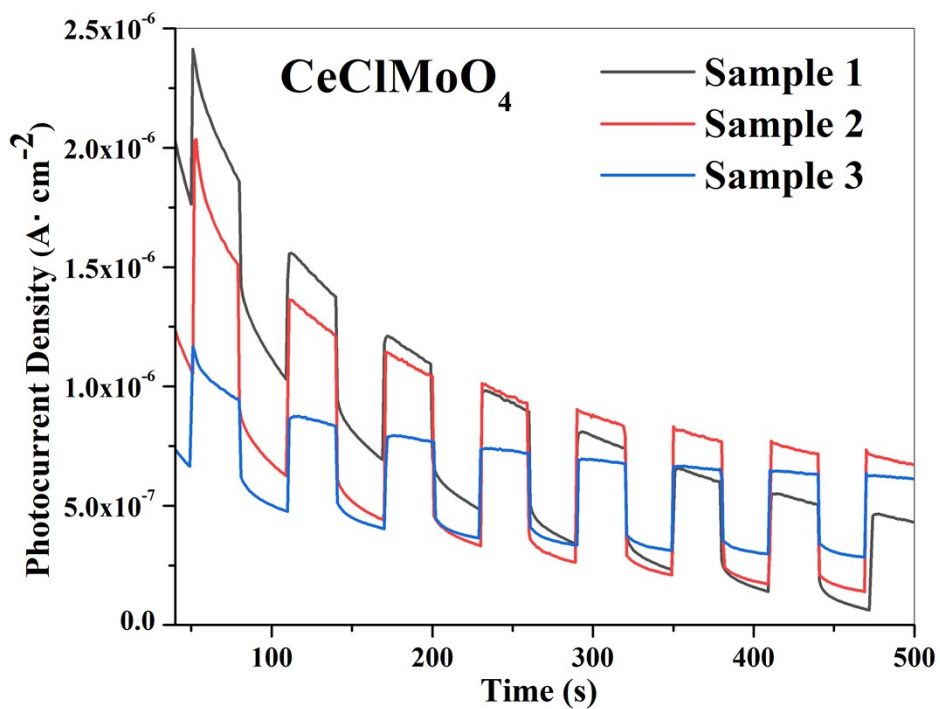

Figure S21. Photocurrent density of three samples of CeClMoO<sub>4</sub>.

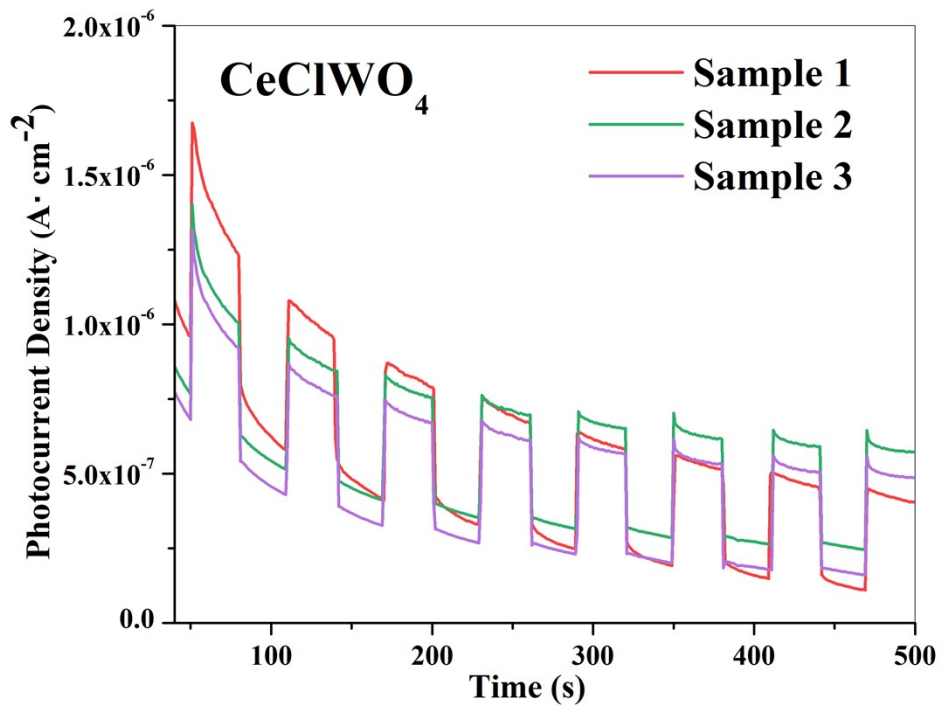

**Figure S22.** Photocurrent density of three samples of CeClWO<sub>4</sub>.

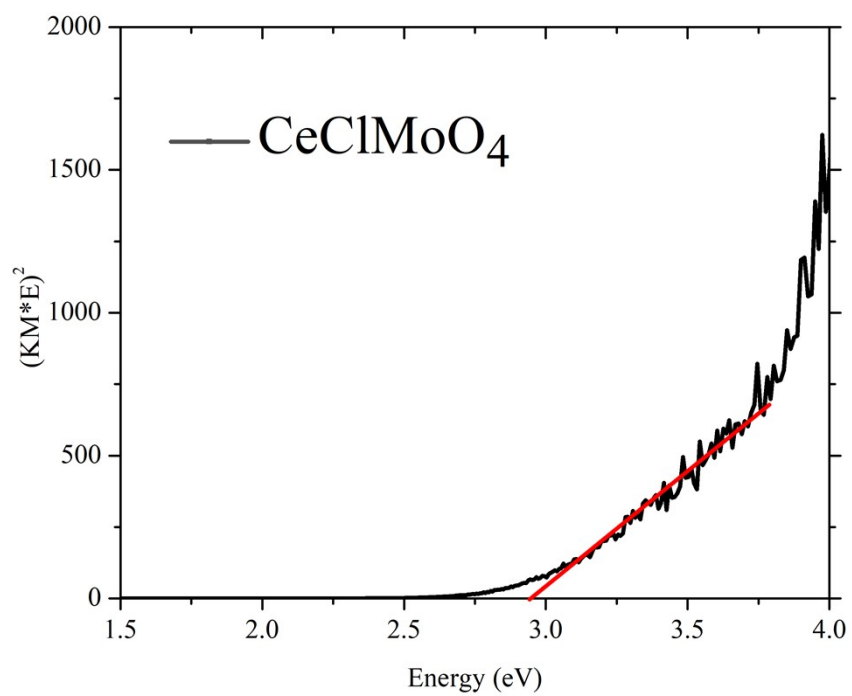

**Figure S23.** The allowed direct transitions of CeClMoO<sub>4</sub> sample.

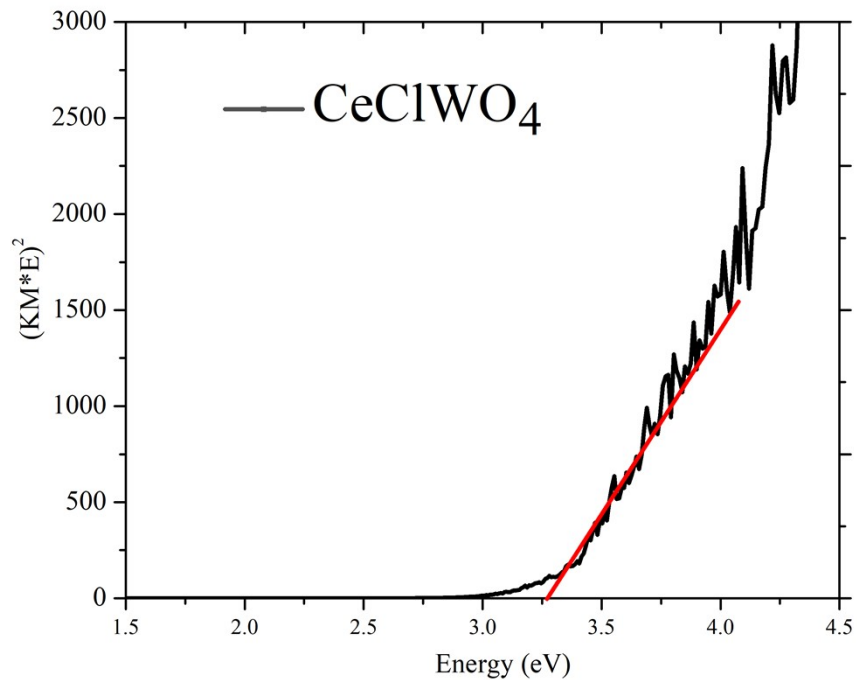

**Figure S24.** The allowed direct transitions of CeClWO<sub>4</sub> sample.

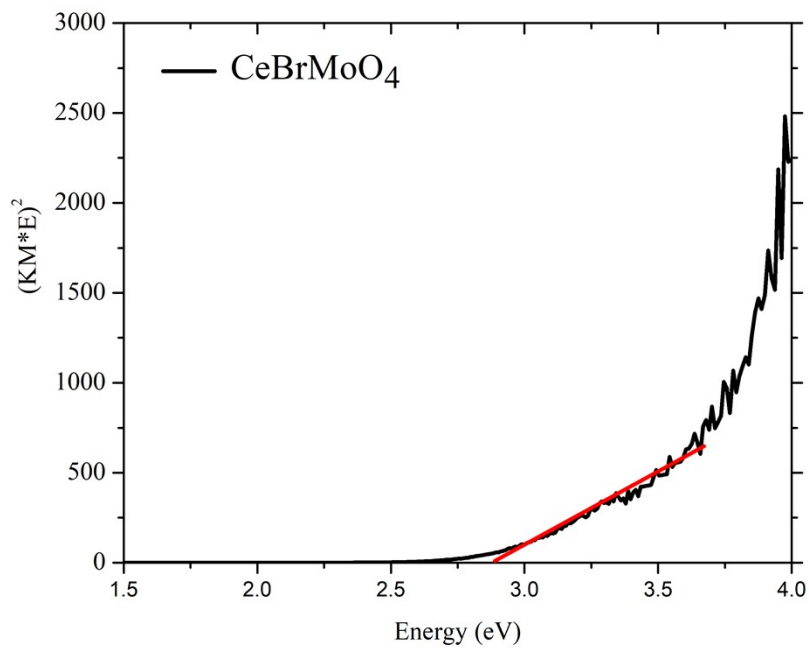

**Figure S25.** The allowed direct transitions of CeBrMoO<sub>4</sub> sample.

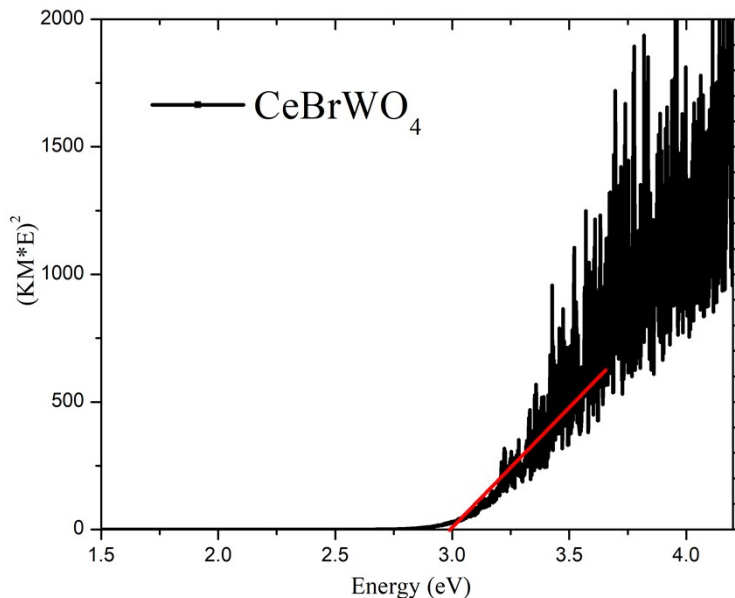

**Figure S26.** The allowed direct transitions of two CeBrWO<sub>4</sub> sample.

Reference:

- [1] I. Hartenbach, T. Schleid, S. Strobel and P. K. Dorhout, *Z. Anorg. Allg. Chem.*, 2010, **636**, 1183–1189.
- [2] T. Schleid and I. Hartenbach, *Z. Anorg. Allg. Chem.*, 2009, **635**, 1904–1909.
- [3] I. Hartenbach, S. Strobel, T. Schleid, K. W. Krämer and P. K. Dorhout, *Z. Anorg. Allg. Chem.*, 2009, **635**, 966–975.
- [4] L. H. Brixner, H. Y. Chen and C. M. Foris, *J. Solid State Chem.*, 1982, **45**, 80–87.
- [5] I. Hartenbach, H. Henning, T. Schleid, T. Schustereit and S. Strobel, *Z. Anorg. Allg. Chem.*, 2013, **639**, 347–353.
- [6] T. Schleid and I. Hartenbach, *Z. Kristallogr. Cryst. Mater.*, 2016, **231**, 449–466.
- [7] T. Schustereit, T. Schleid, H. A. Höpfe, K. Kazmierczak and I. Hartenbach, *J. Solid State Chem.*, 2015, **226**, 299–306.
- [8] T. Schustereit, H. Henning, T. Schleid and I. Hartenbach, *Z. Naturforsch. B J. Chem. Sci.*, 2013, **68**, 616–624.
- [9] T. Schustereit, T. Schleid and I. Hartenbach, *Solid State Sci.*, 2015, **48**, 218–224.
- [10] C. Liu, Y. Xiao, H. Wang, W. Chai, X. Liu, D. Yan, H. Lin and Y. Liu, *Inorg. Chem.*, 2020, **59**, 1577–1581.
- [11] L.-T. Jiang, M.-Z. Li, X.-M. Jiang, B.-W. Liu and G.-C. Guo, *Dalton Trans.*, 2022, **51**, 6638–6645.
- [12] C. Liu, P. Hou, W. Chai, J. Tian, X. Zheng, Y. Shen, M. Zhi, C. Zhou and Y. Liu, *J. Alloys Compd.*, 2016, **679**, 420–425.
- [13] S. Al Bacha, S. Saitzek, E. E. McCabe and H. Kabbour, *Inorg. Chem.*, 2022, **61**, 18611–18621.
- [14] N. Zhang, S.-S. Han, Y. Xie, D.-L. Chen, W.-D. Yao, X. Huang, W. Liu and S.-P. Guo, *Inorg. Chem.*, 2023, **62**, 7681–7688.

- [15] J. Bao, W. Quan, Y. Ning, H. Wang, Q. Wei, L. Huang, W. Zhang, Y. Ma, X. Hu and H. Tian, *Inorg. Chem.*, 2023, **62**, 1086–1094.
- [16] Z. Zhijie, L. Deben, H. Hao, C. Yaoqing and X. Jiayue, *Inorg. Chem.*, 2023, **62**, 9240–9248.
- [17] Y. Chi, T.-F. Jiang, H.-G. Xue and S.-P. Guo, *Inorg. Chem.*, 2019, **58**, 3574–3577.
- [18] Y. Chi, L.-Z. Rong, N.-T. Suen, H.-G. Xue and S.-P. Guo, *Inorg. Chem.*, 2018, **57**, 5343–5351.
- [19] W. Zhou, W.-D. Yao, R.-L. Tang, H. Xue and S.-P. Guo, *J. Alloys Compd.*, 2021, **867**, 158879.
- [20] A. Sarkar, A. Das, S. Ash, K. V. Ramanujachary, S. E. Lofland, N. Das, K. Bhattacharyya and A. K. Ganguli, *Inorg. Chem.*, 2023, **62**, 9324–9334.
- [21] Y. Xiao, S.-H. Zhou, R. Yu, Y. Shen, Z. Ma, H. Lin and Y. Liu, *Inorg. Chem.*, 2021, **60**, 9263–9267.
- [22] X. Huang, S.-H. Yang, W. Liu and S.-P. Guo, *Inorg. Chem.*, 2022, **61**, 12954–12958.
- [23] V. Werner, U. Aschauer, G. J. Redhammer, J. Schoiber, G. A. Zickler and S. Pokrant, *Inorg. Chem.*, 2023, **62**, 6649–6660.
- [24] M. Zhou, K. Xiao, X. Jiang, H. Huang, Z. Lin, J. Yao and Y. Wu, *Inorg. Chem.*, 2016, **55**, 12783–12790.
- [25] M. Zhou, X. Jiang, X. Jiang, K. Xiao, Y. Guo, H. Huang, Z. Lin, J. Yao, C.-H. Tung, L.-Z. Wu and Y. Wu, *Inorg. Chem.*, 2017, **56**, 5173–5181.
